# Supplementary material for: Silver(i)–N-heterocyclic carbene catalyzed multicomponent reactions: a facile synthesis of multisubstituted pyridines
Source: Royal Society of Chemistry journal article supplement (doi:10.1039/c5ra16582b), 2015-01-01
Supplement: c5ra16582b1.pdf [file c5ra16582b1.pdf]

## Electronic Supplementary information

### Silver(I)-*N*-heterocyclic carbene catalyzed multicomponent reactions: a facile synthesis of multisubstituted pyridines

Shravankumar Kankala,<sup>a</sup> Ramakanth Pagadala,<sup>a</sup> Suresh Maddila,<sup>a</sup> Chandra Sekhar Vasam,<sup>\*b,c</sup> Sreekantha B. Jonnalagadda<sup>\*a</sup>

<sup>a</sup>School of Chemistry & Physics, University of Kwazulu-Natal, Westville Campus, Chiltern Hills, Durban-4000, South Africa. Fax: +27 31 260 3091; Tel: +27 31 260 7325/3090; E-mail: jonnalagaddas@ukzn.ac.za

<sup>b</sup>Department of Chemistry, Satavahana University, Karimnagar, India.

<sup>c</sup>Department of Pharmaceutical Chemistry, Telangana University, Nizamabad, India. Fax: +91-878-2255933; Tel: +91-9000285433; E-mail: vasamcs@yahoo.co.in

## List of Contents

1. Table S1. Optimization of reaction parameters for the synthesis of **3a**.
2. Table S2. Results of catalyst load experiment.
3. Spectra of pyridine compounds (**3a-i** & **4a-d**).
4. D<sub>2</sub>O exchange study of compound (**3i**).
5. Single Crystal X-ray data of compound (**3a**).

1. **Table S1.** Optimization of reaction parameters for the synthesis of **3a**.

| Entry | Catalyst                               | Time (min.) | Yield (%) <sup>a</sup> |
|-------|----------------------------------------|-------------|------------------------|
| 1     | No Catalyst                            | 360         | --                     |
| 2     | AgOAc                                  | 120         | --                     |
| 3     | AgOTf                                  | 120         | --                     |
| 4     | AgSbF <sub>6</sub>                     | 120         | --                     |
| 5     | AgNO <sub>3</sub>                      | 120         | --                     |
| 6     | Ag(I)-NHC ( <b>a</b> )                 | 10          | 94                     |
| 7     | Ag(I)-NHC ( <b>b</b> )                 | 12          | 86                     |
| 8     | Ag(I)-NHC ( <b>c</b> )                 | 10          | 90                     |
| 9     | Ag(I)-NHC ( <b>d</b> )                 | 10          | 90                     |
| 10    | Ag(I)-NHC ( <b>e</b> )                 | 10          | 88                     |
| 11    | Ag(I)-NHC ( <b>f</b> )                 | 15          | 91                     |
| 12    | Organo-NHC                             | 40          | 32                     |
| 13    | Organo-NHC + AgOAc                     | 15          | 84                     |
| 14    | Organo-NHC + AgOTf                     | 15          | 80                     |
| 15    | DABCO                                  | 30          | 65                     |
| 16    | PPh <sub>3</sub>                       | 45          | 50                     |
| 17    | AgOTf + DABCO                          | 40          | 74                     |
| 18    | AgOTf + TEA                            | 40          | 58                     |
| 19    | AgOTf + K <sub>2</sub> CO <sub>3</sub> | 40          | 52                     |
| 20    | AgOAc + DABCO                          | 40          | 70                     |
| 21    | AgOTf + DBU                            | 35          | 75                     |
| 22    | AgOAc + NaOAc                          | 35          | 65                     |
| 23    | Cu(OAc) <sub>2</sub> + DBU             | 60          | 55                     |
| 24    | Al(OTf) <sub>3</sub> + DBU             | 60          | 45                     |
| 25    | Cu(OTf) <sub>2</sub>                   | 120         | --                     |
| 26    | Ni(OTf) <sub>2</sub>                   | 120         | --                     |
| 27    | Organo-NHC + Cu(OTf) <sub>2</sub>      | 30          | 68                     |
| 28    | Organo-NHC + Al(OTf) <sub>3</sub>      | 30          | 62                     |
| 29    | Organo-NHC + Sc(OTf) <sub>3</sub>      | 45          | 70                     |
| 30    | Organo-NHC + Ni(OTf) <sub>2</sub>      | 40          | 65                     |

<sup>a</sup> GC Yields. <sup>b</sup> Knoevenagel condensed product.

2. **Table S2.** Catalyst load experiment in the multicomponent reaction of **1a** and **2a** catalyzed by Ag(I)-NHC (i) catalyst.

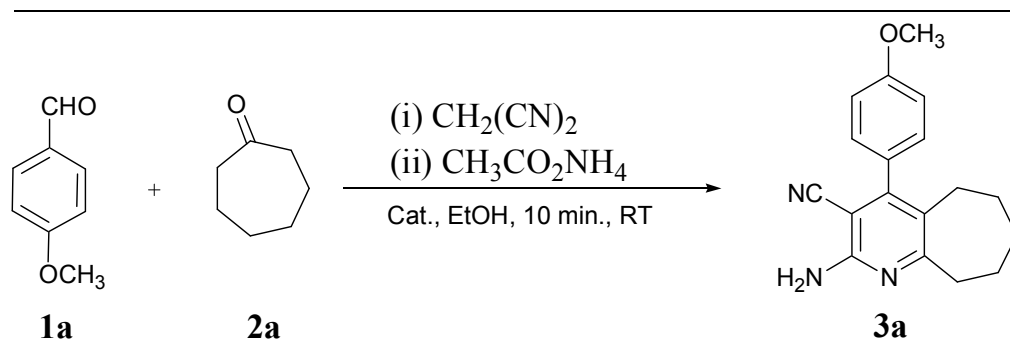

| Entry | Ag(I)-NHC (a) | GC yield (%) |
|-------|---------------|--------------|
| 1     | 2.0 mol%      | 94           |
| 2     | 3.0 mol%      | 96           |
| 3     | 3.5 mol%      | 96           |
| 4     | 4.0 mol%      | 96           |

3. Spectra of pyridine compounds (3a-i & 4a-d).

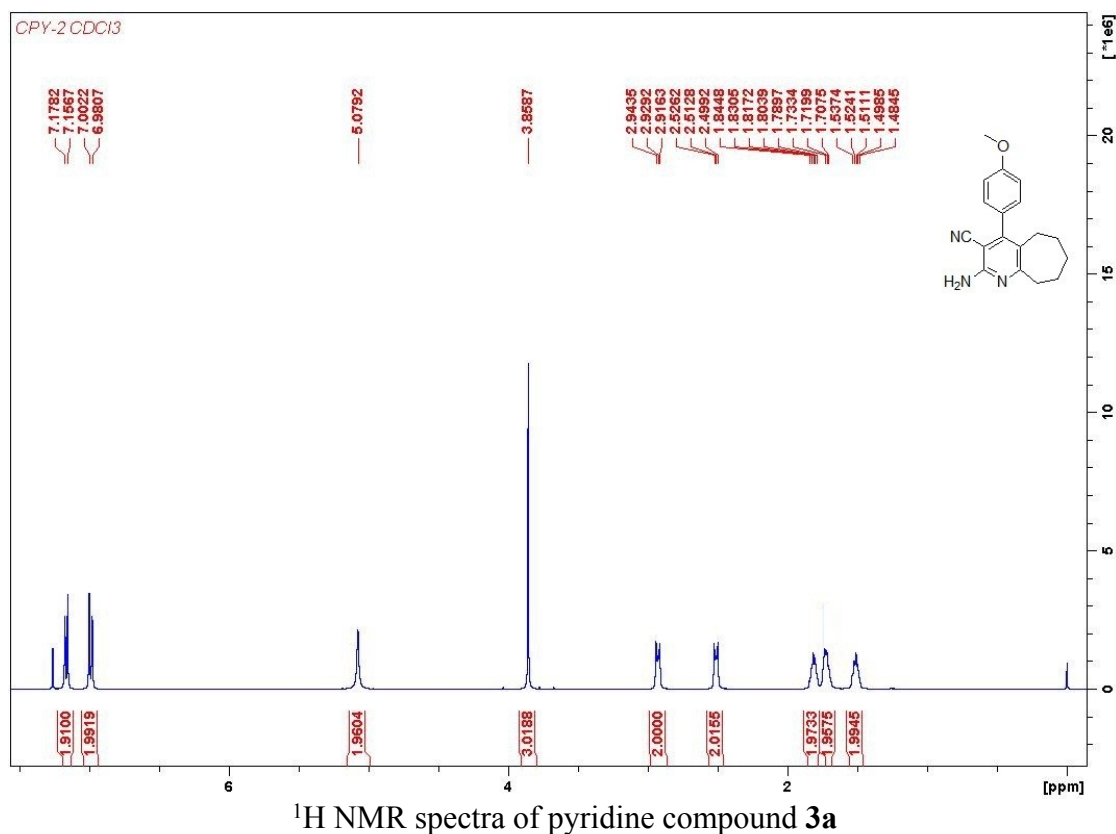

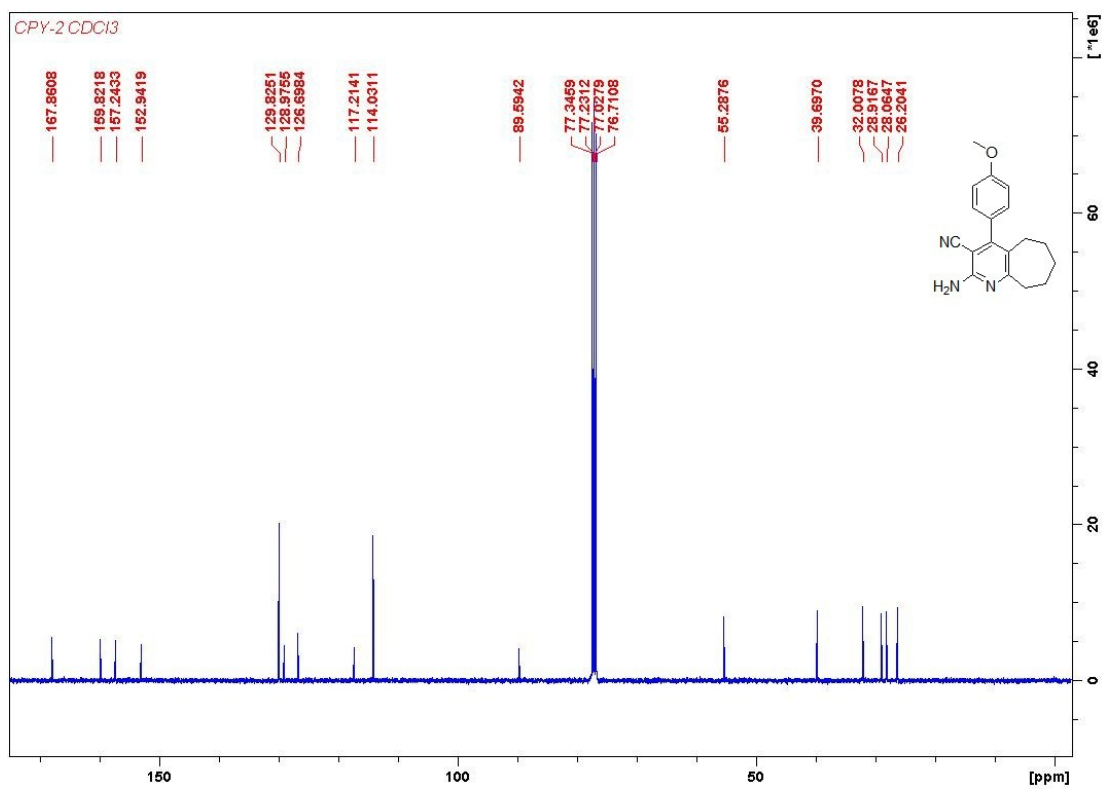

<sup>13</sup>C NMR spectra of pyridine compound 3a

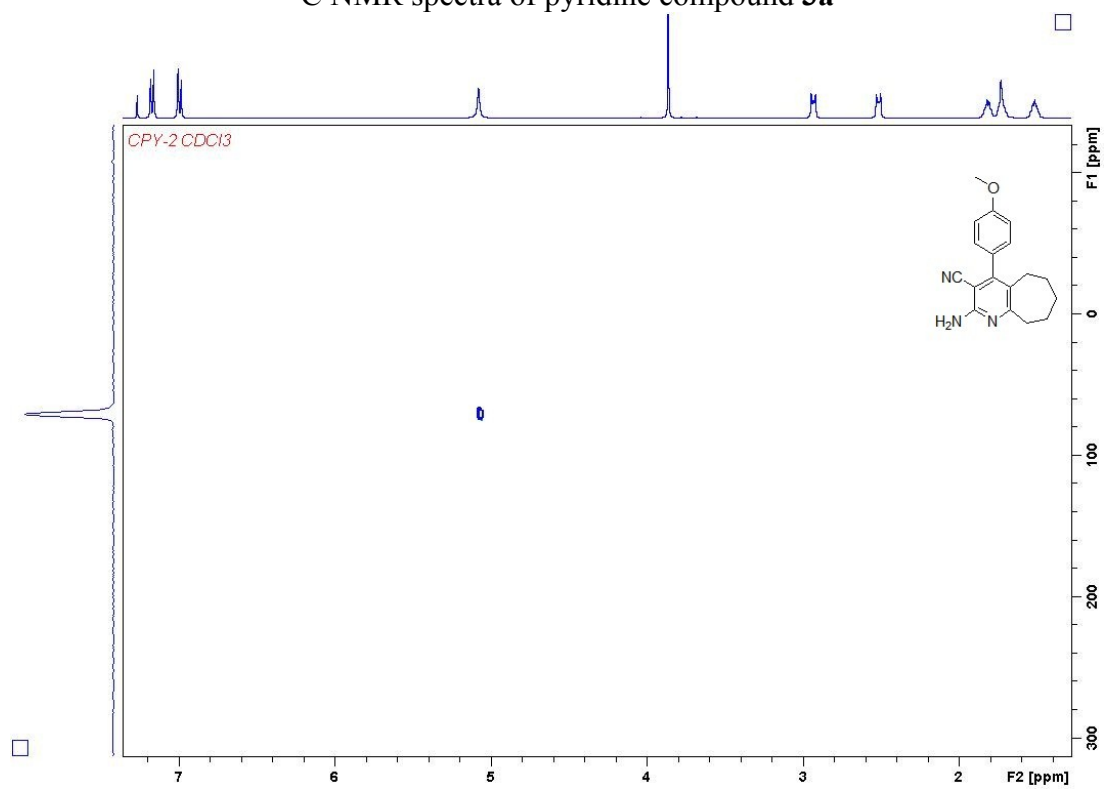

<sup>15</sup>N NMR (ghsqc) spectra of pyridine compound 3a

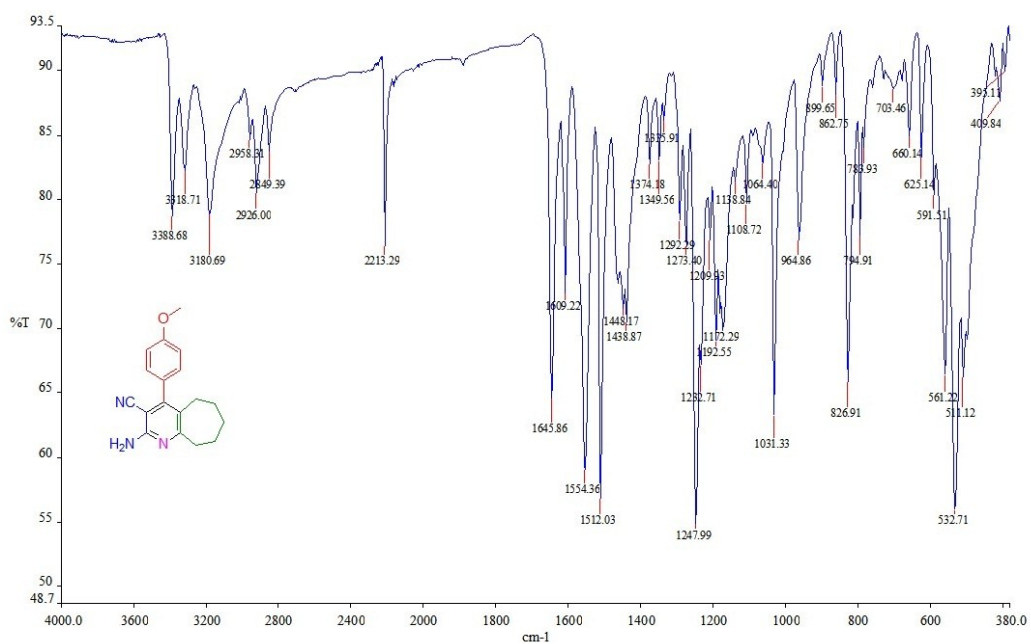

FTIR spectra of pyridine compound **3a**

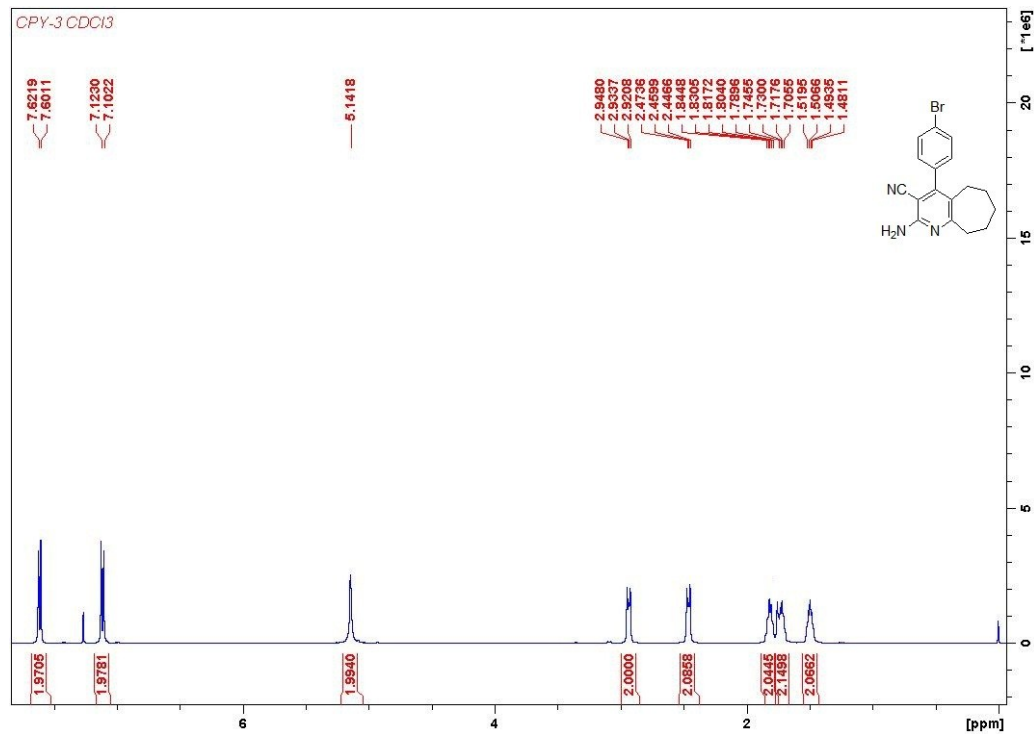

<sup>1</sup>H NMR spectra of pyridine compound **3b**

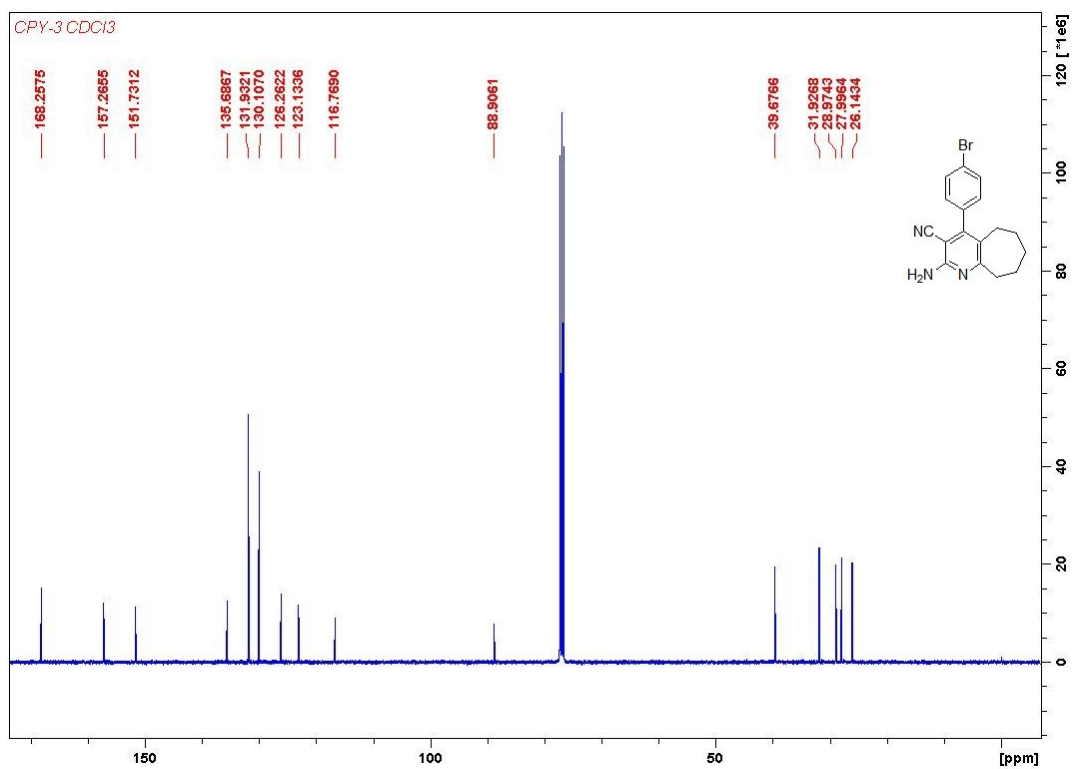

<sup>13</sup>C NMR spectra of pyridine compound **3b**

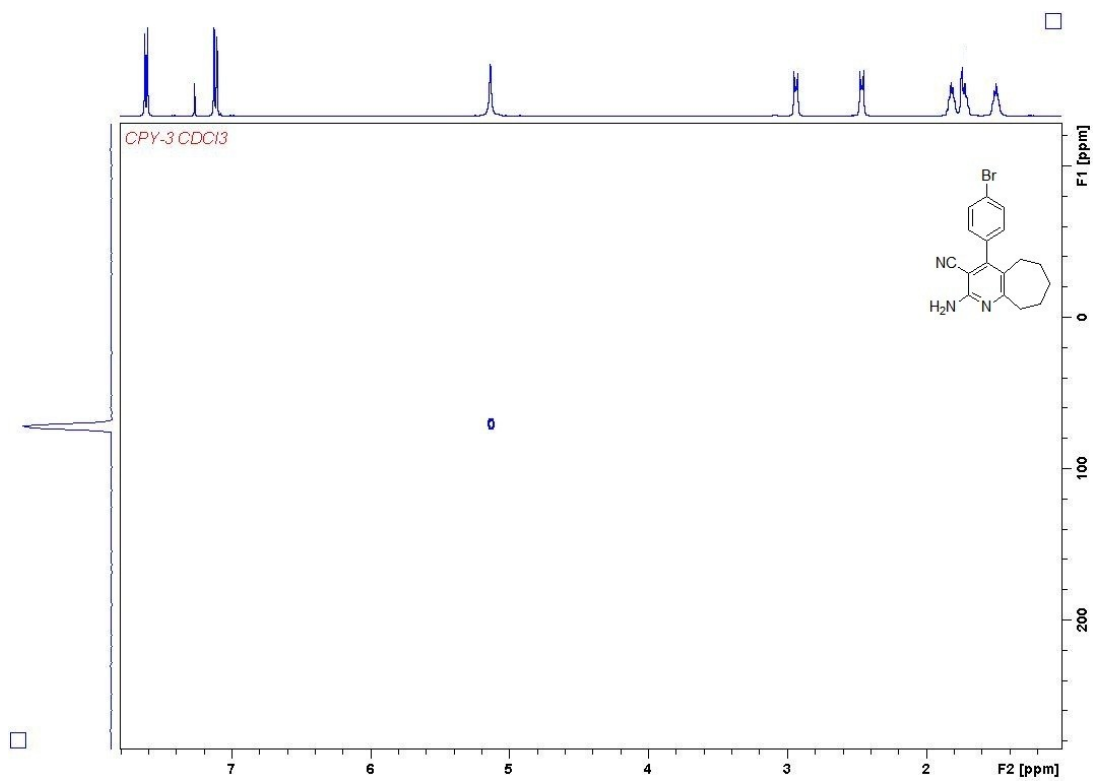

<sup>15</sup>N NMR (ghsqc) spectra of pyridine compound **3b**

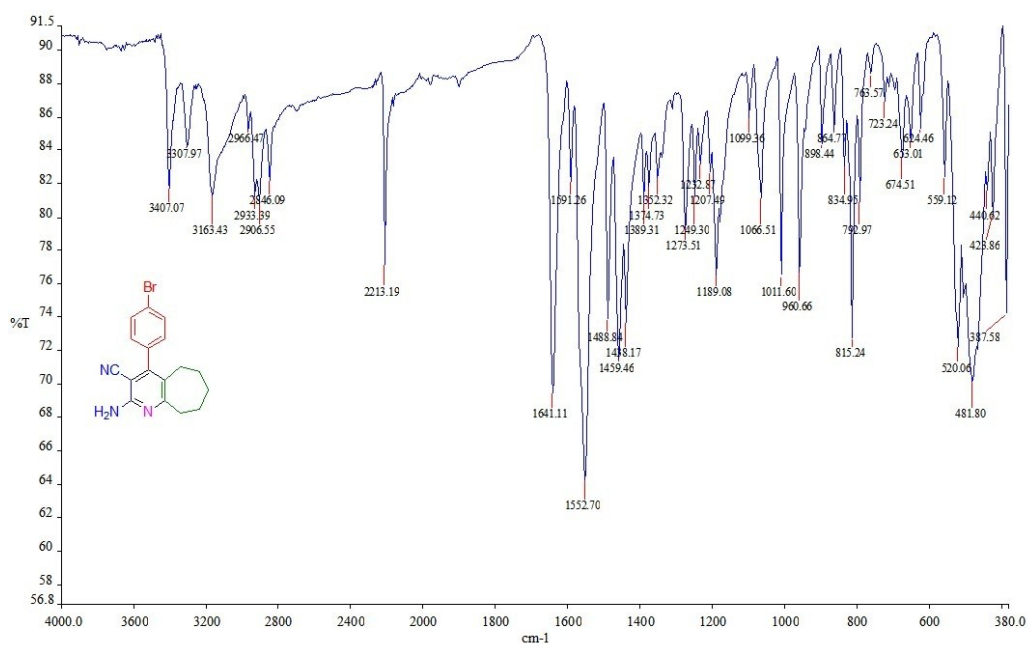

FTIR spectra of pyridine compound **3b**

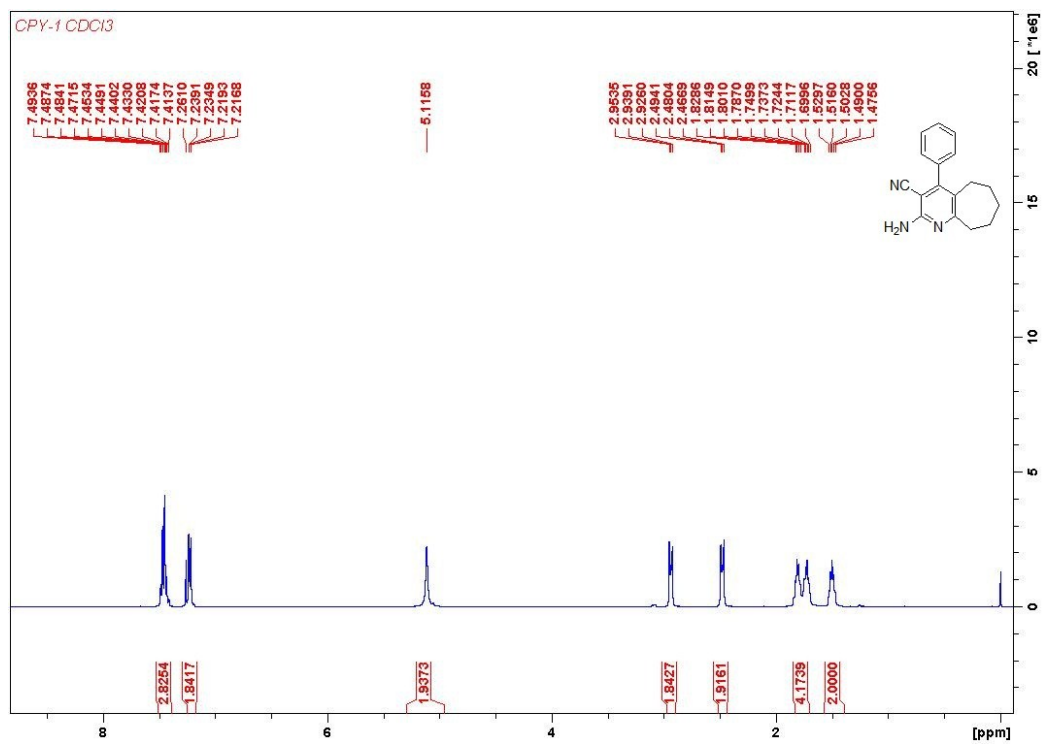

<sup>1</sup>H NMR spectra of pyridine compound **3c**

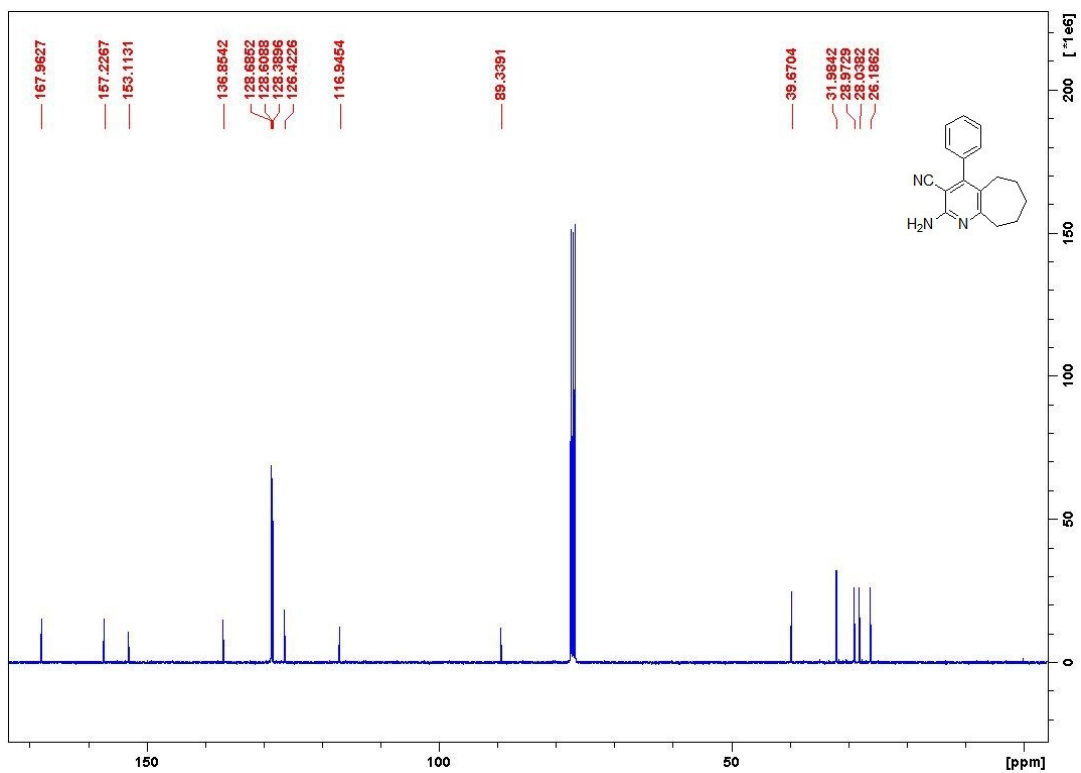

<sup>13</sup>C NMR spectra of pyridine compound 3c

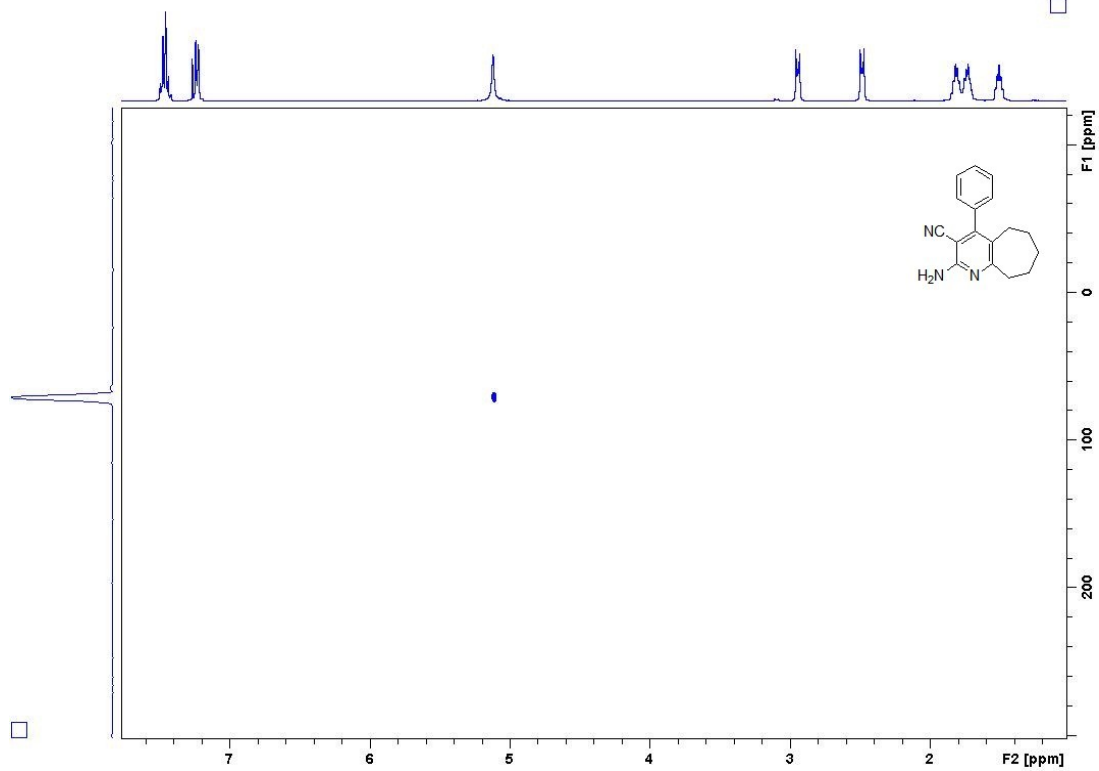

<sup>15</sup>N NMR (ghsqc) spectra of pyridine compound 3c



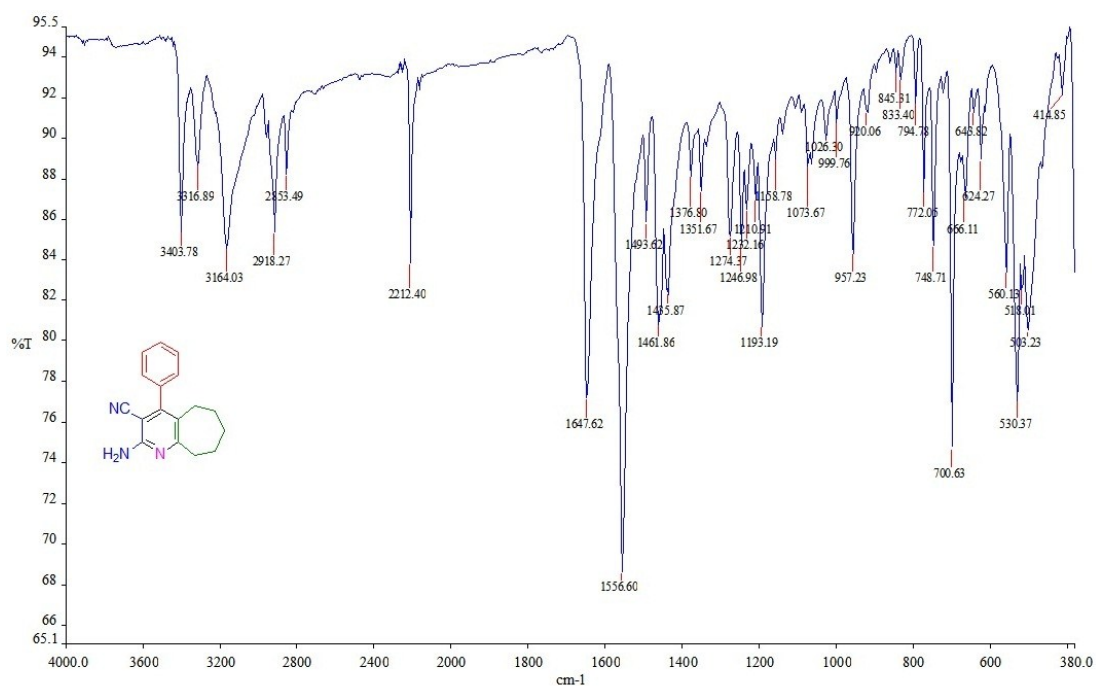

FTIR spectra of pyridine compound **3c**

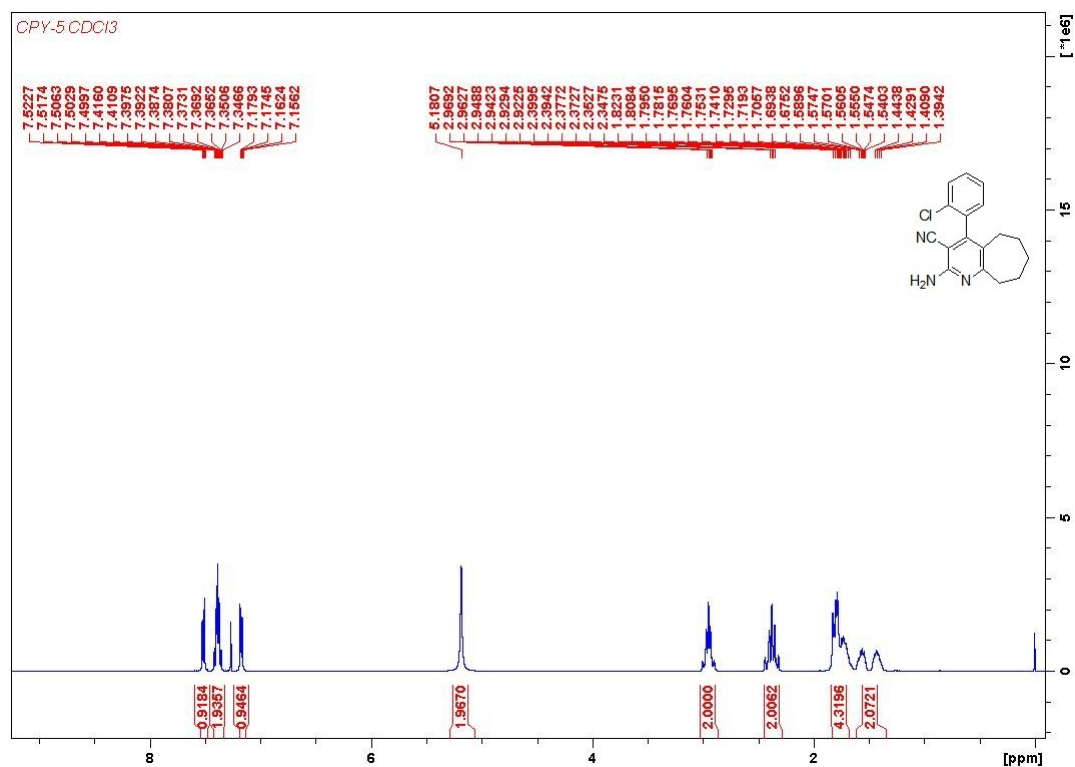

<sup>1</sup>H NMR spectra of pyridine compound **3d**

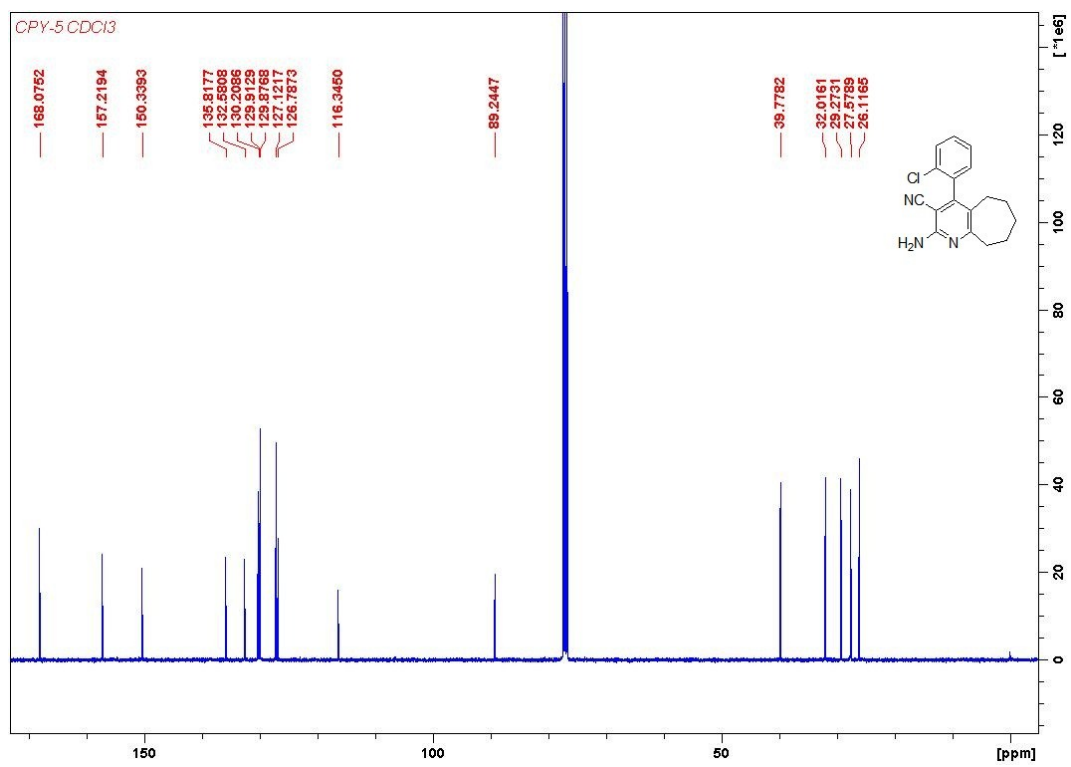

<sup>13</sup>C NMR spectra of pyridine compound **3d**

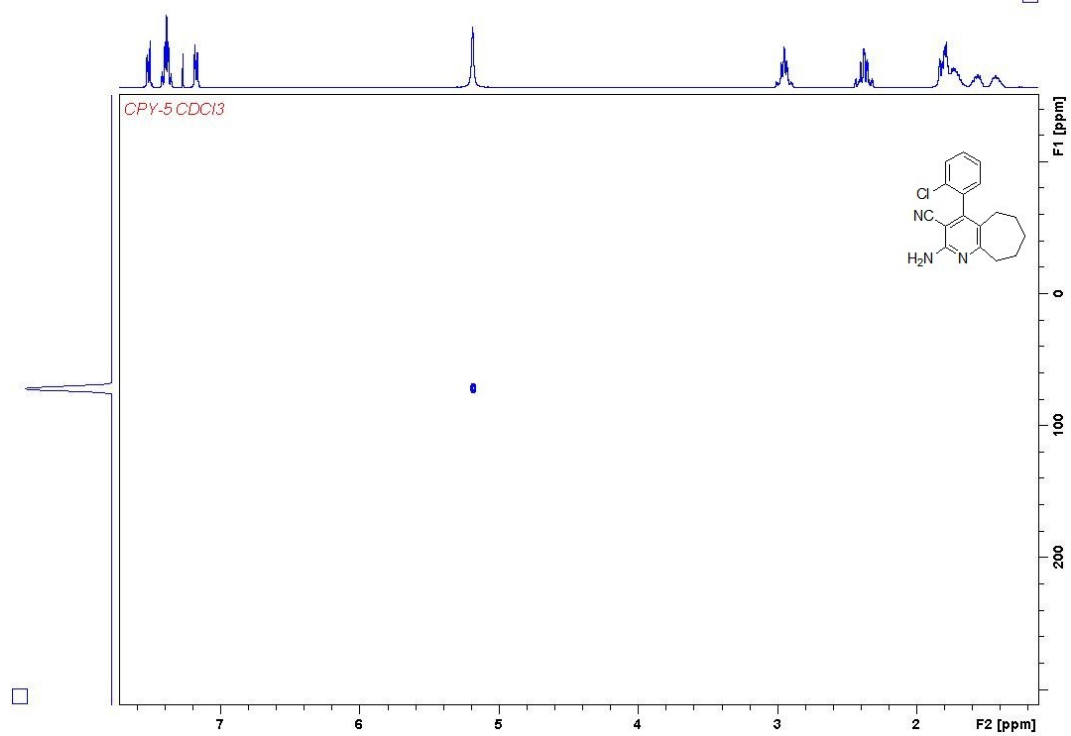

<sup>15</sup>N NMR (ghsqc) spectra of pyridine compound **3d**

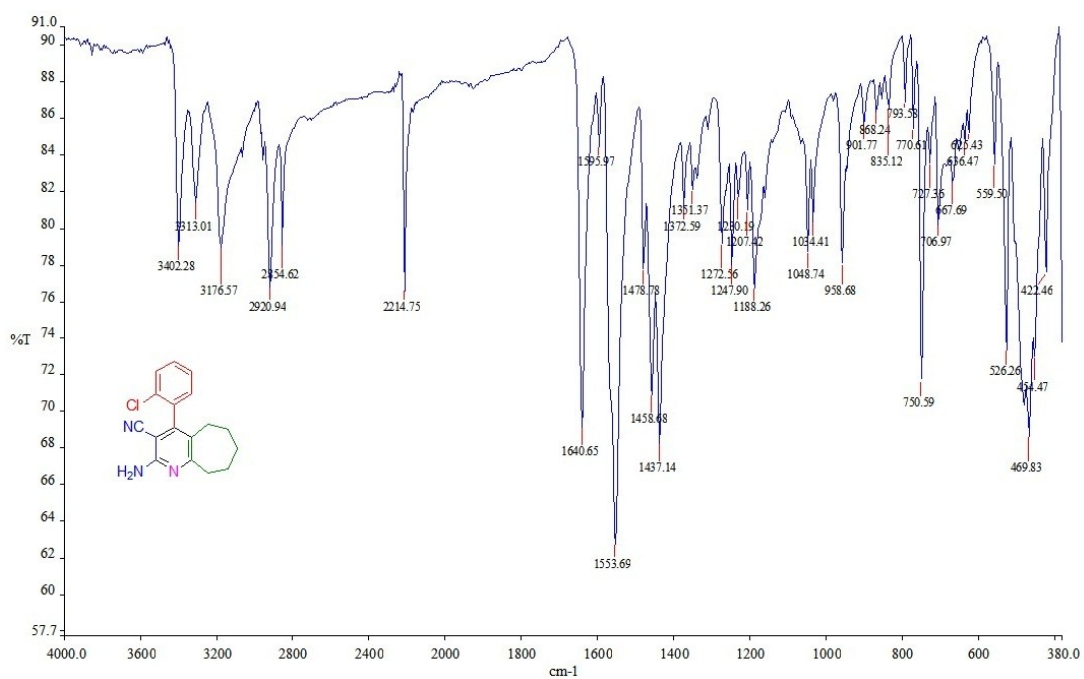

FTIR spectra of pyridine compound **3d**

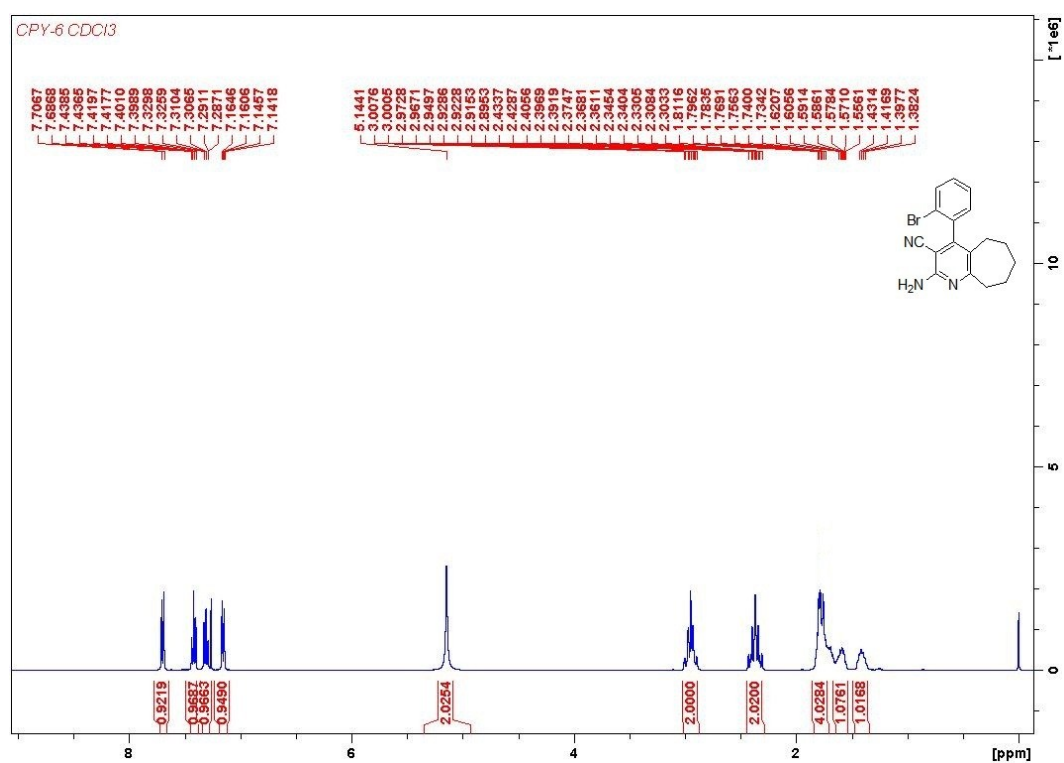

<sup>1</sup>H NMR spectra of pyridine compound **3e**

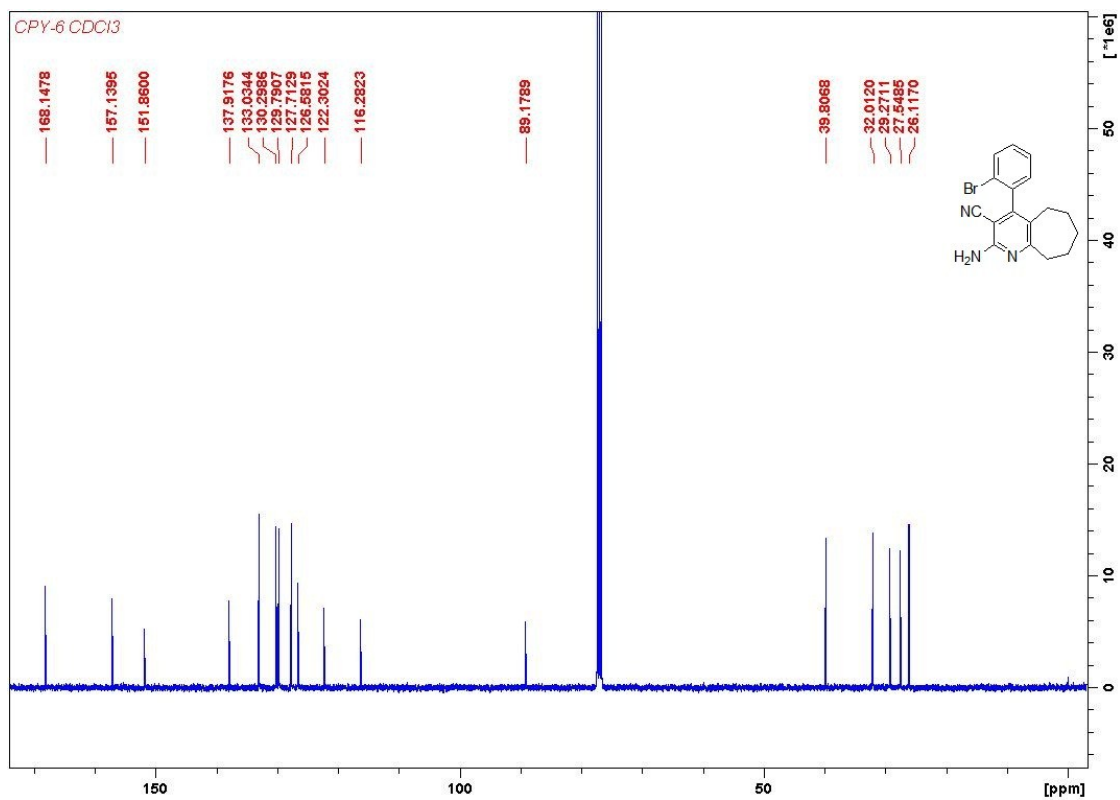

<sup>13</sup>C NMR spectra of pyridine compound **3e**

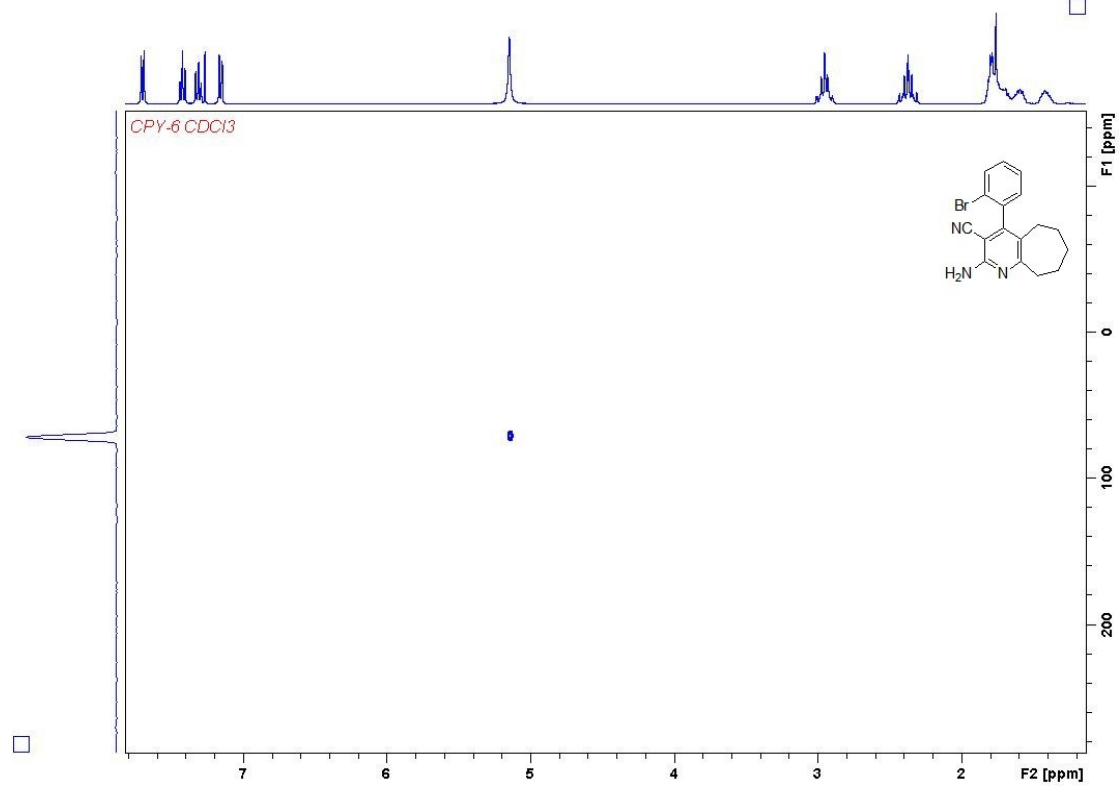

<sup>15</sup>N NMR (ghsqc) spectra of pyridine compound **3e**

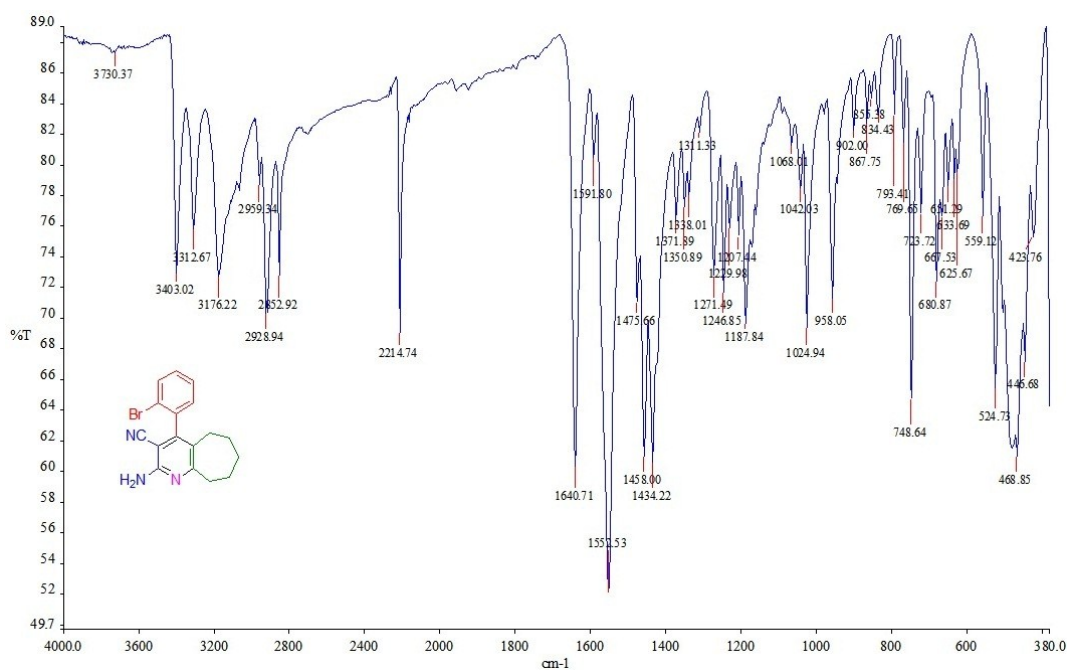

FTIR spectra of pyridine compound **3e**

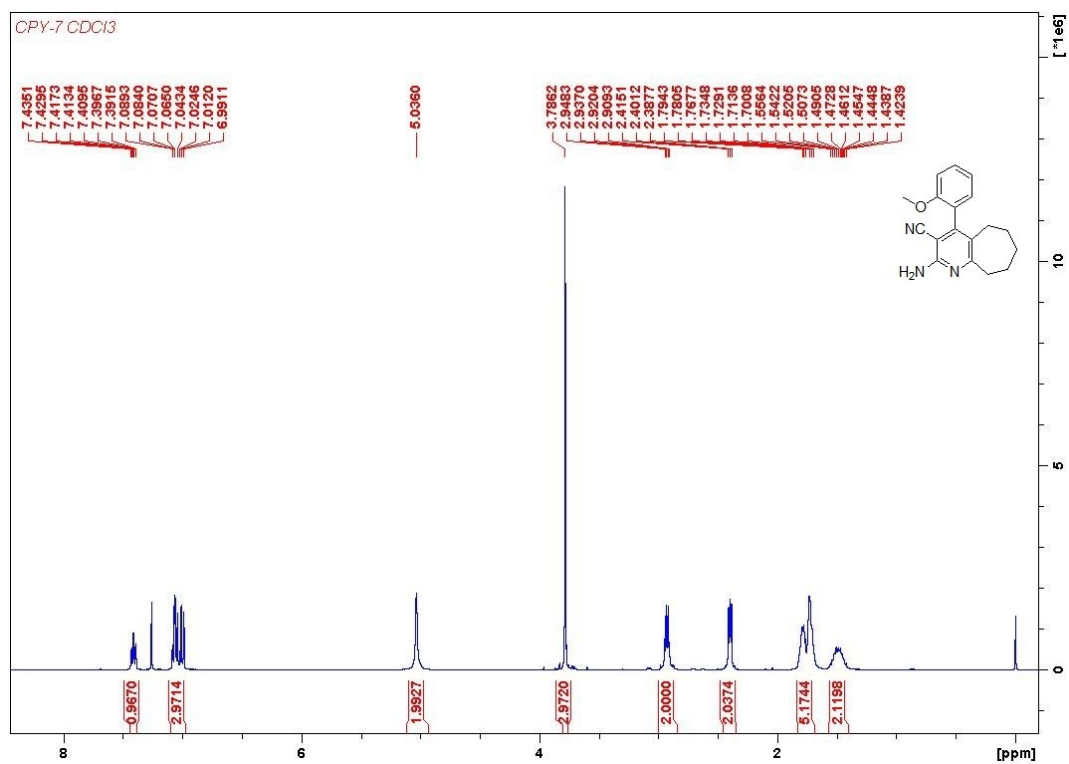

<sup>1</sup>H NMR spectra of pyridine compound **3f**

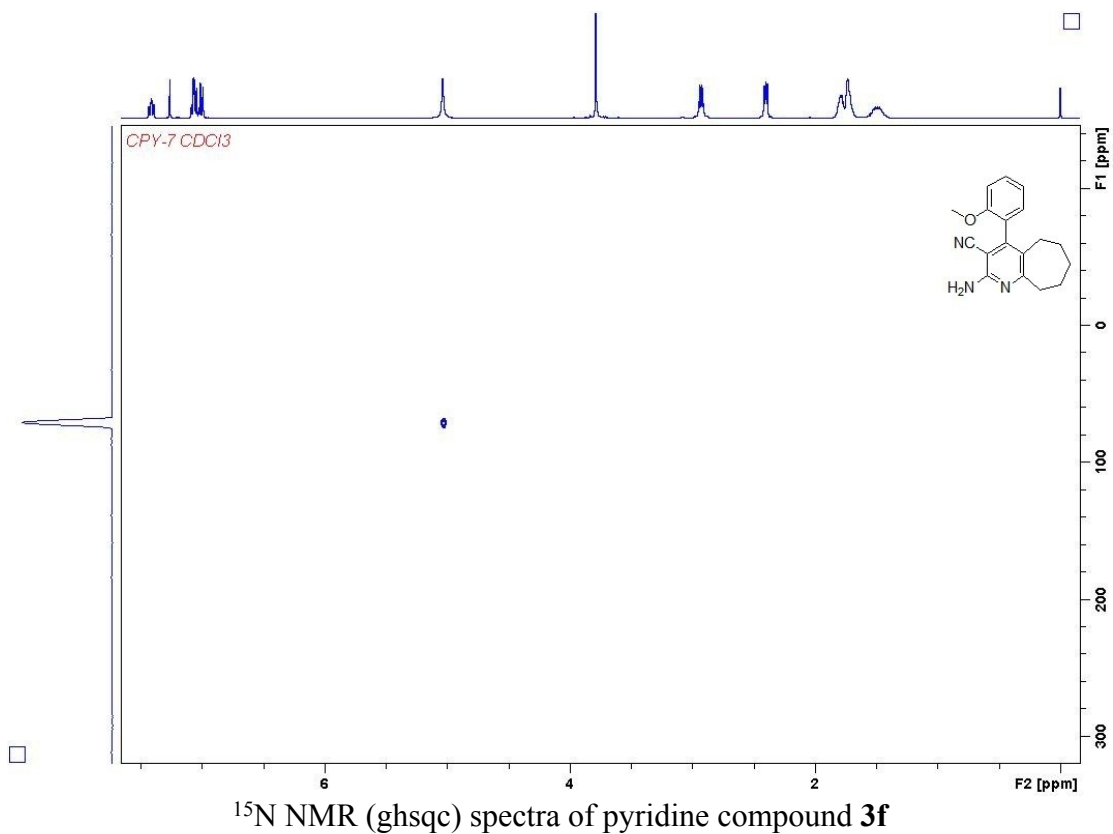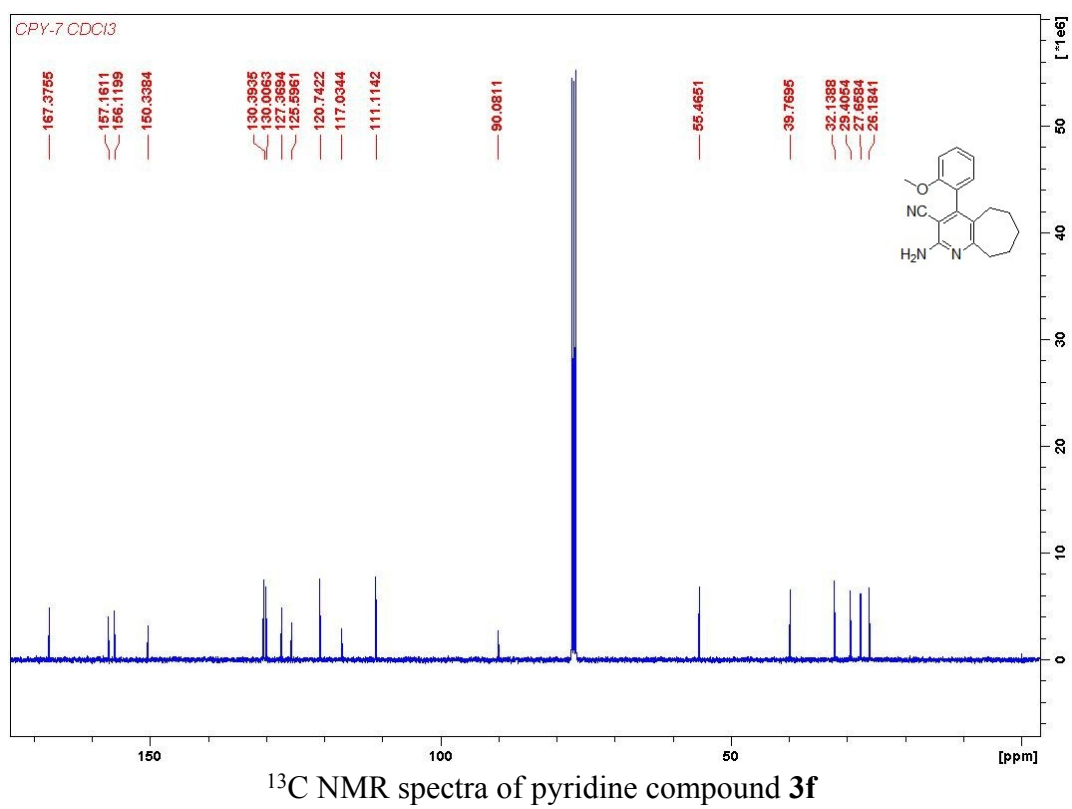

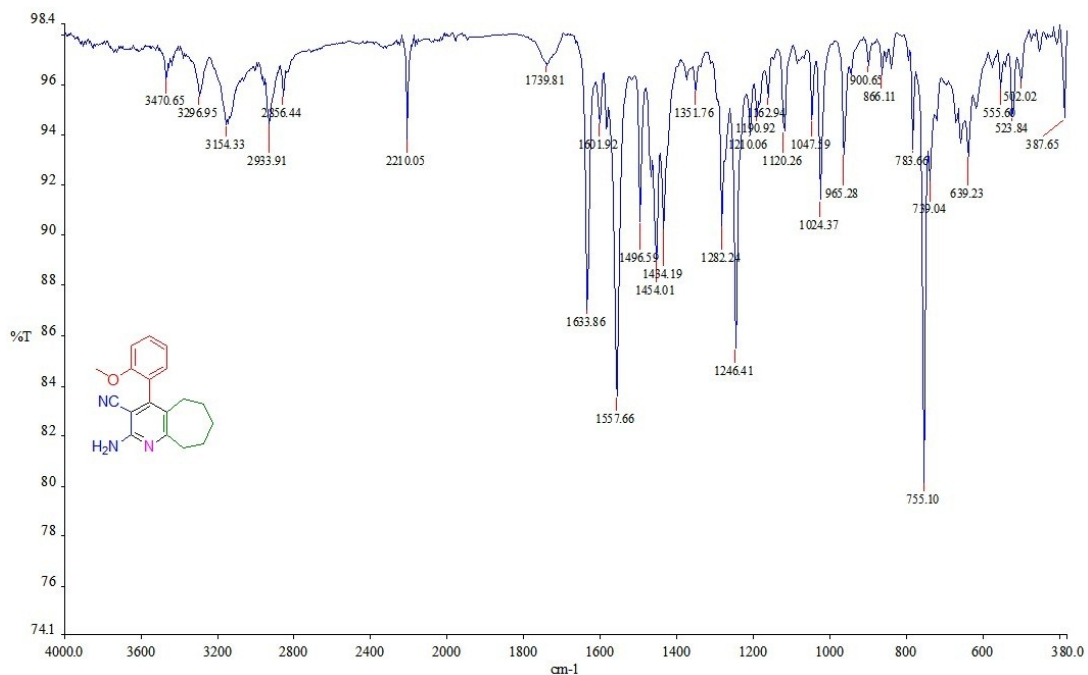

FTIR spectra of pyridine compound **3f**

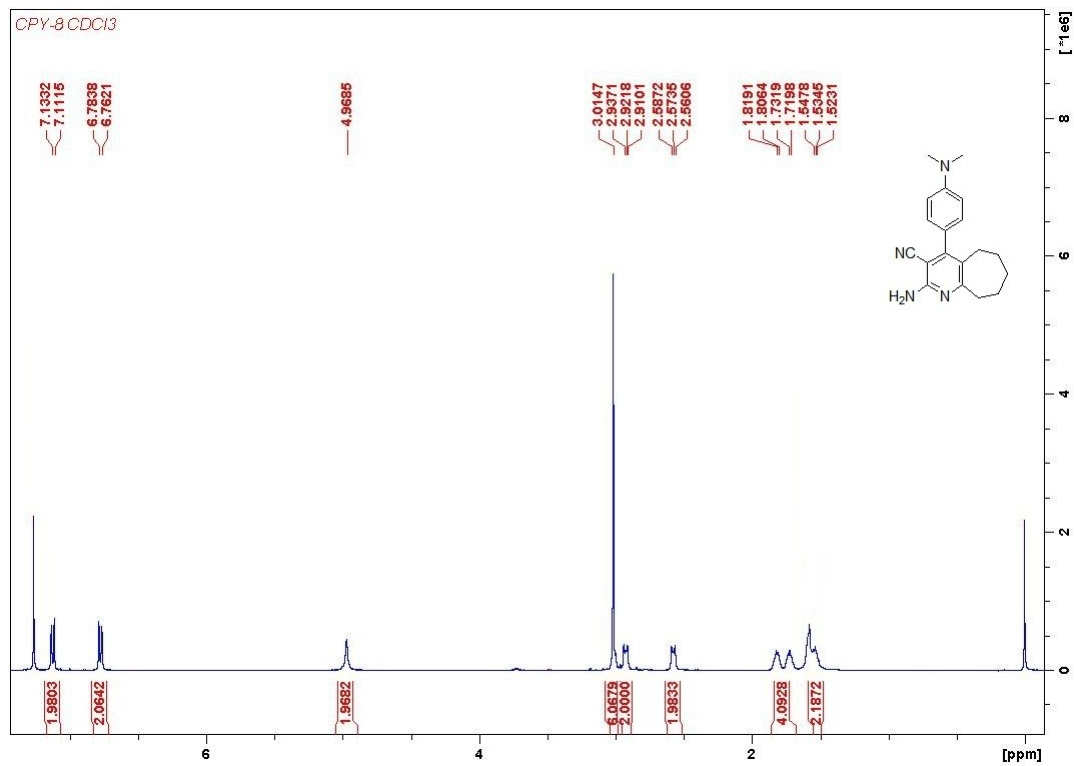

<sup>1</sup>H NMR spectra of pyridine compound **3g**

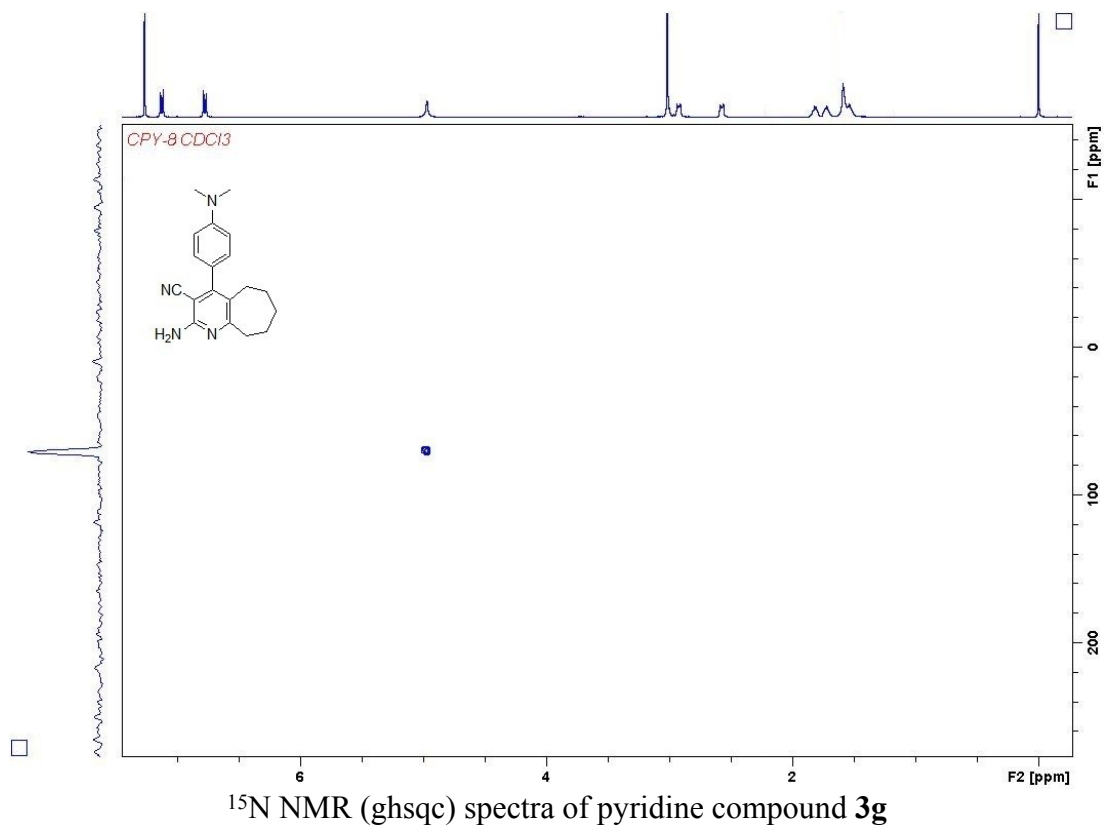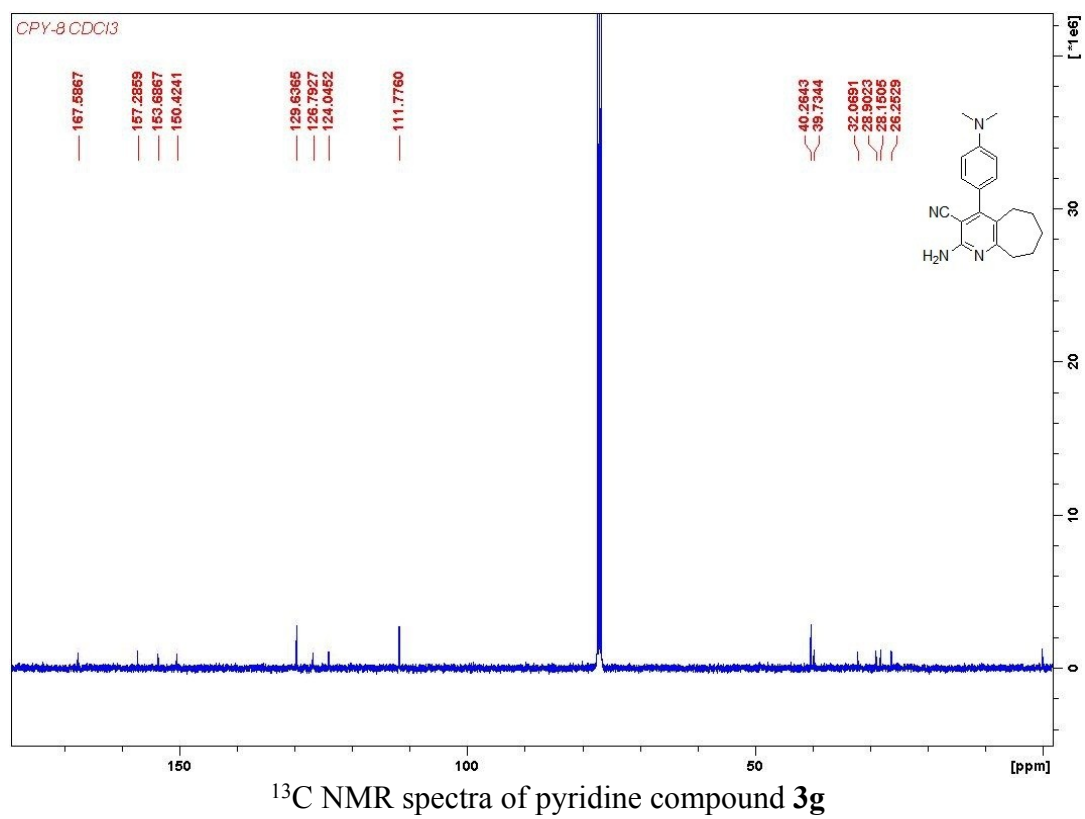



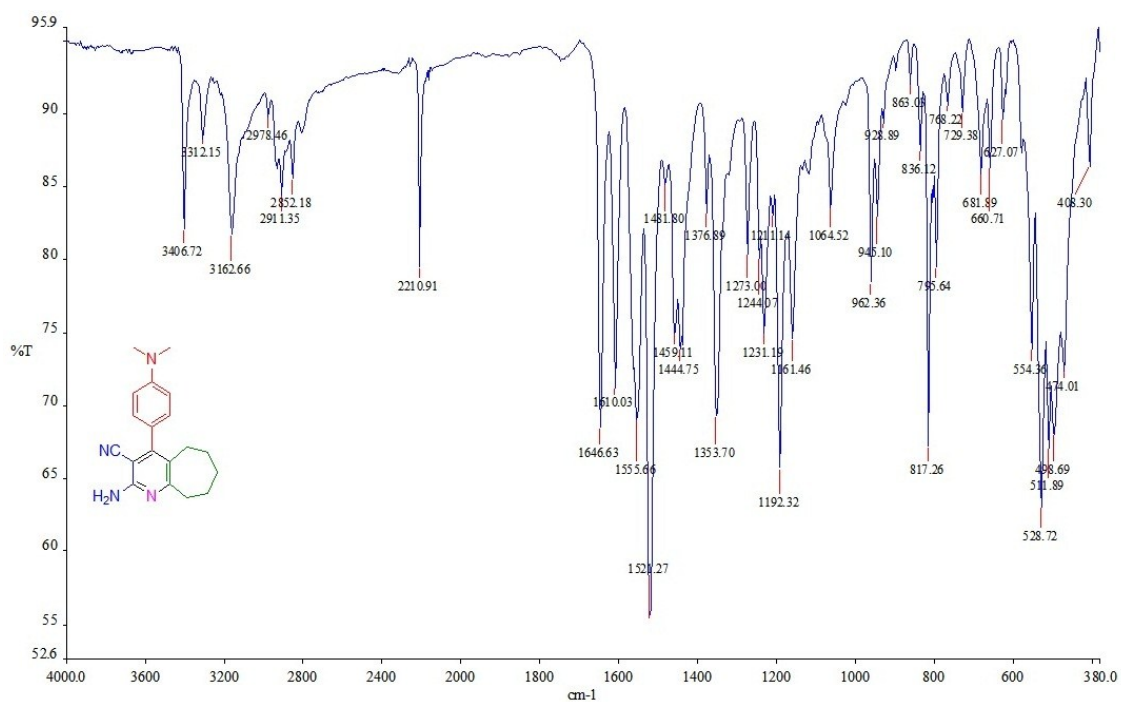

FTIR spectra of pyridine compound **3g**

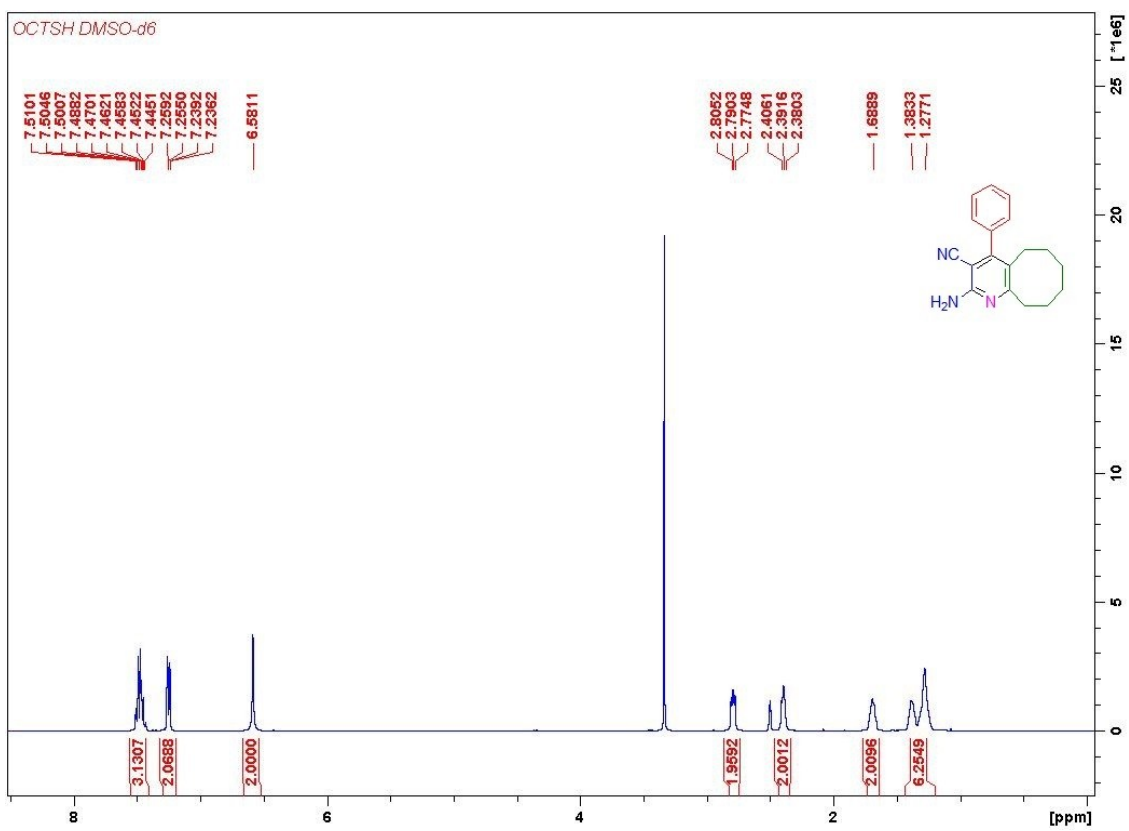

<sup>1</sup>H NMR spectra of pyridine compound **3h**

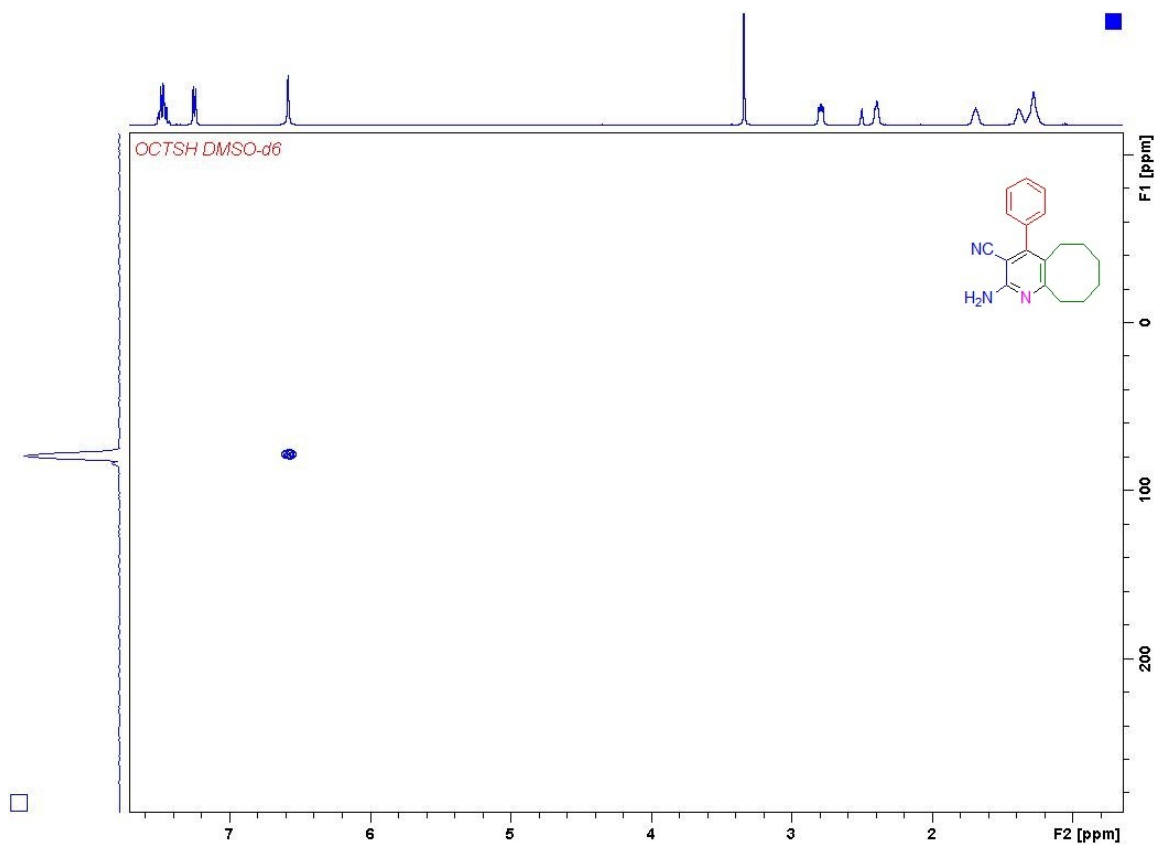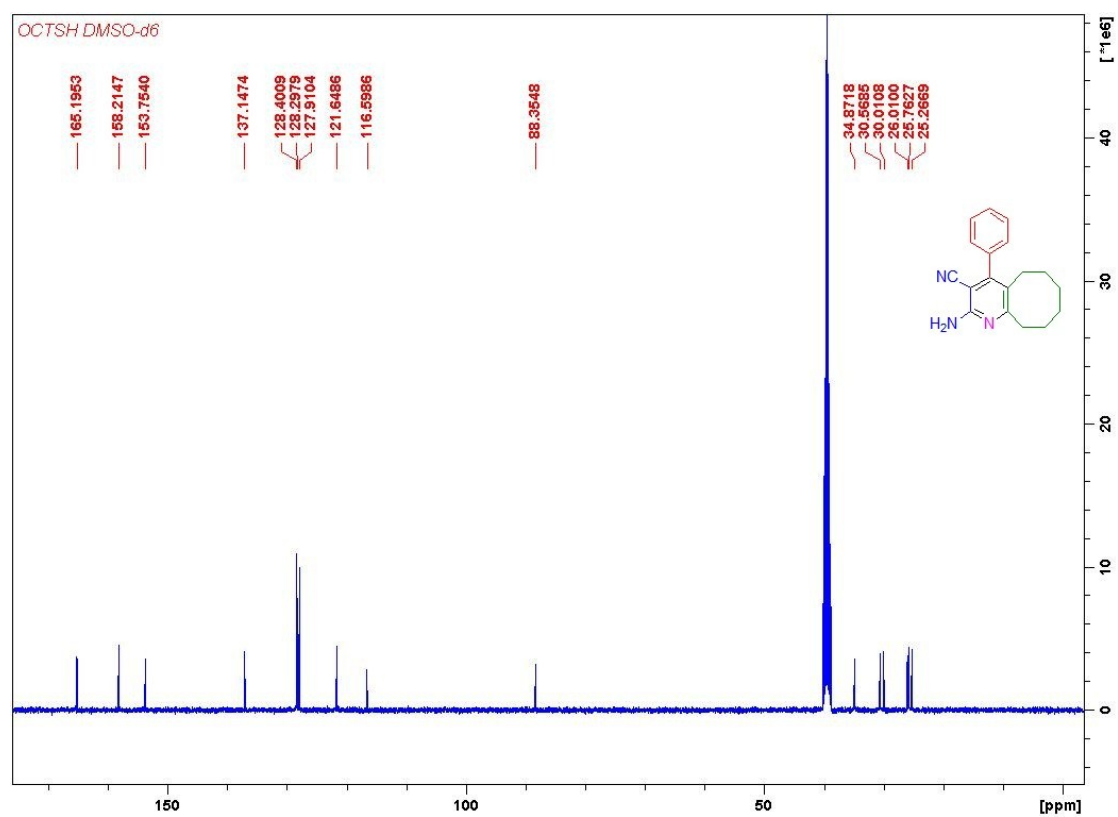

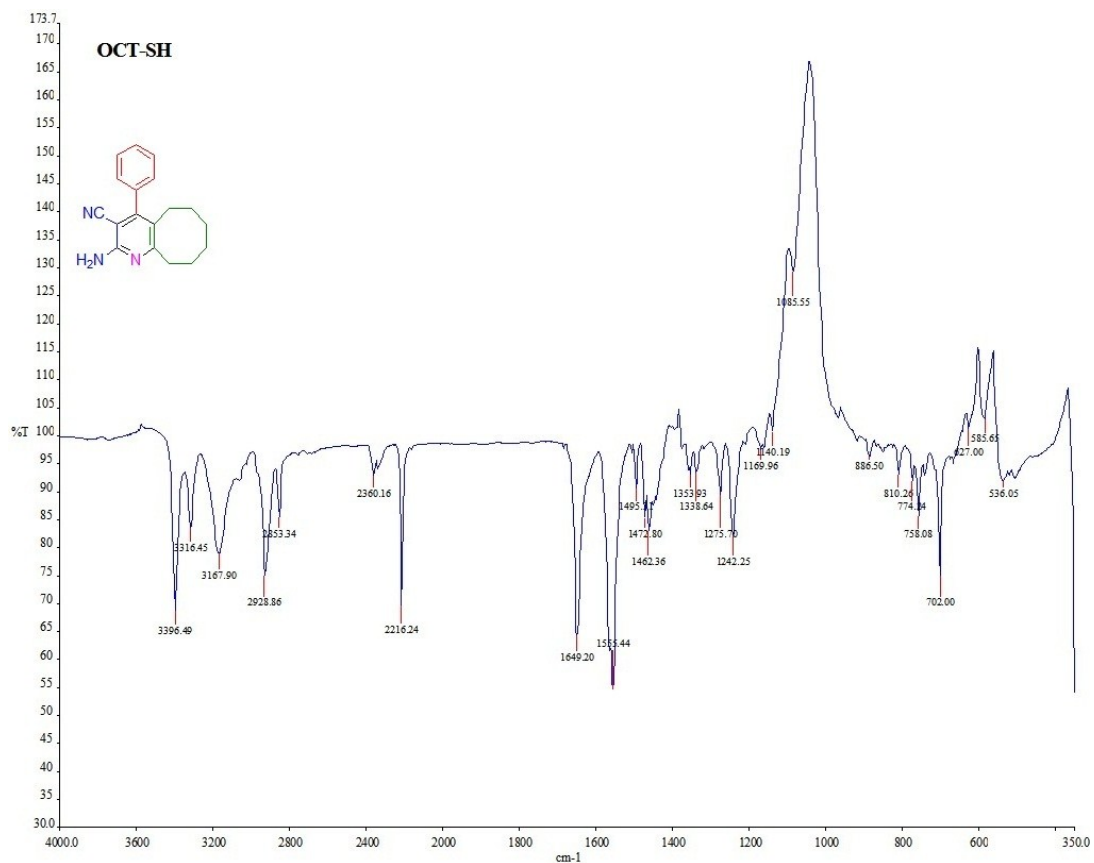

FTIR spectra of pyridine compound **3h**

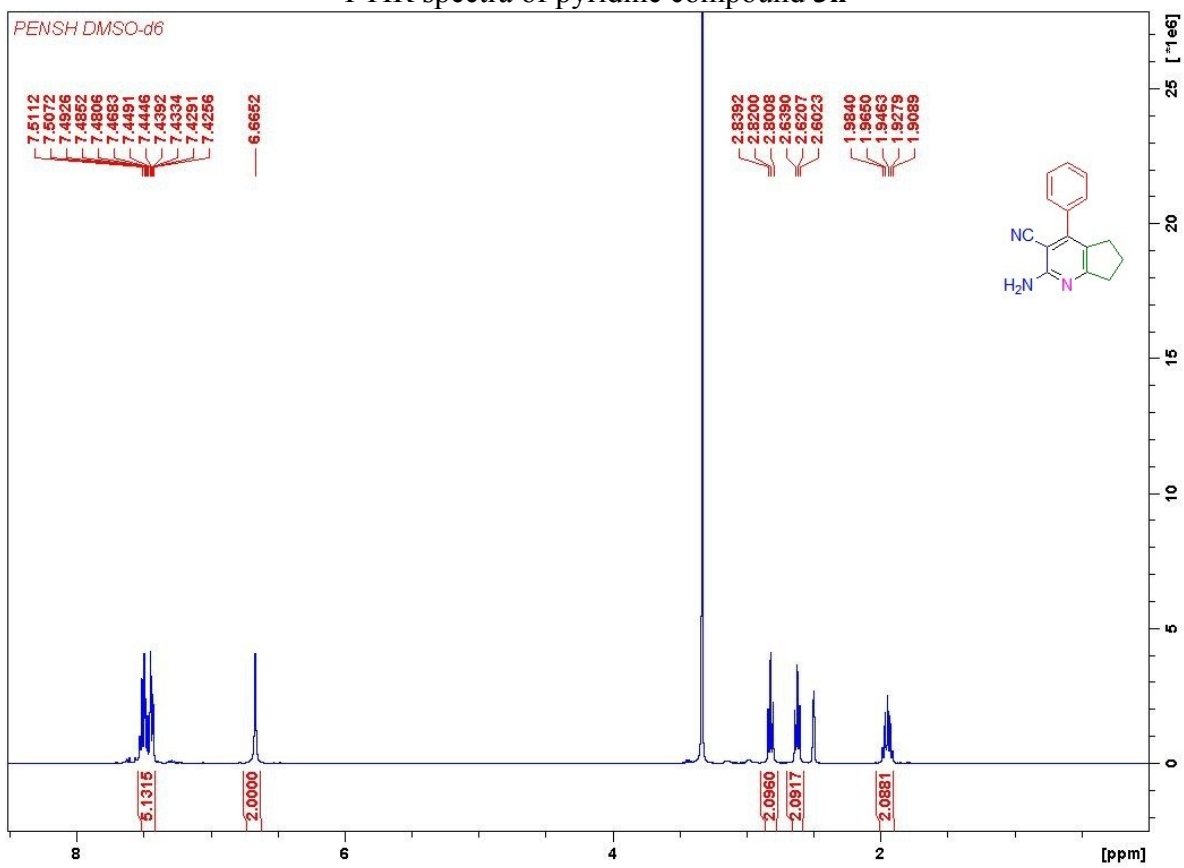

<sup>1</sup>H NMR spectra of pyridine compound **3i**

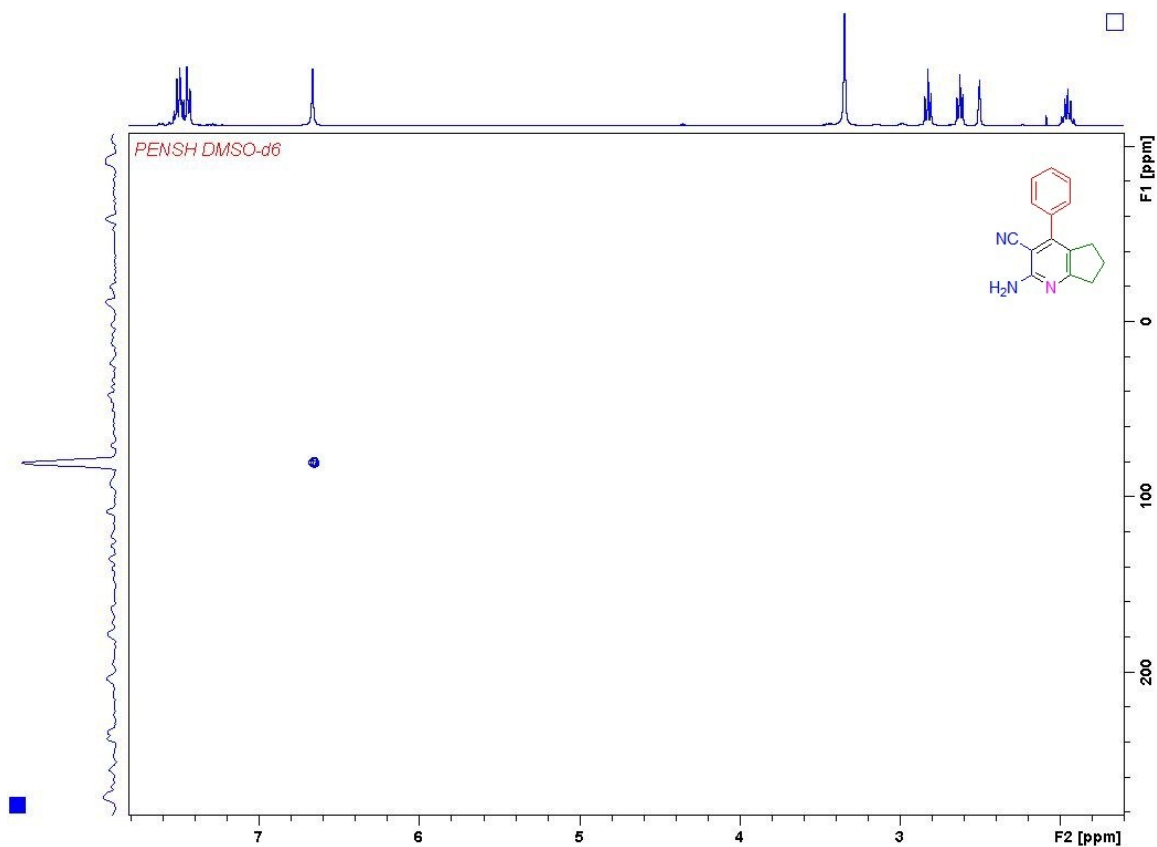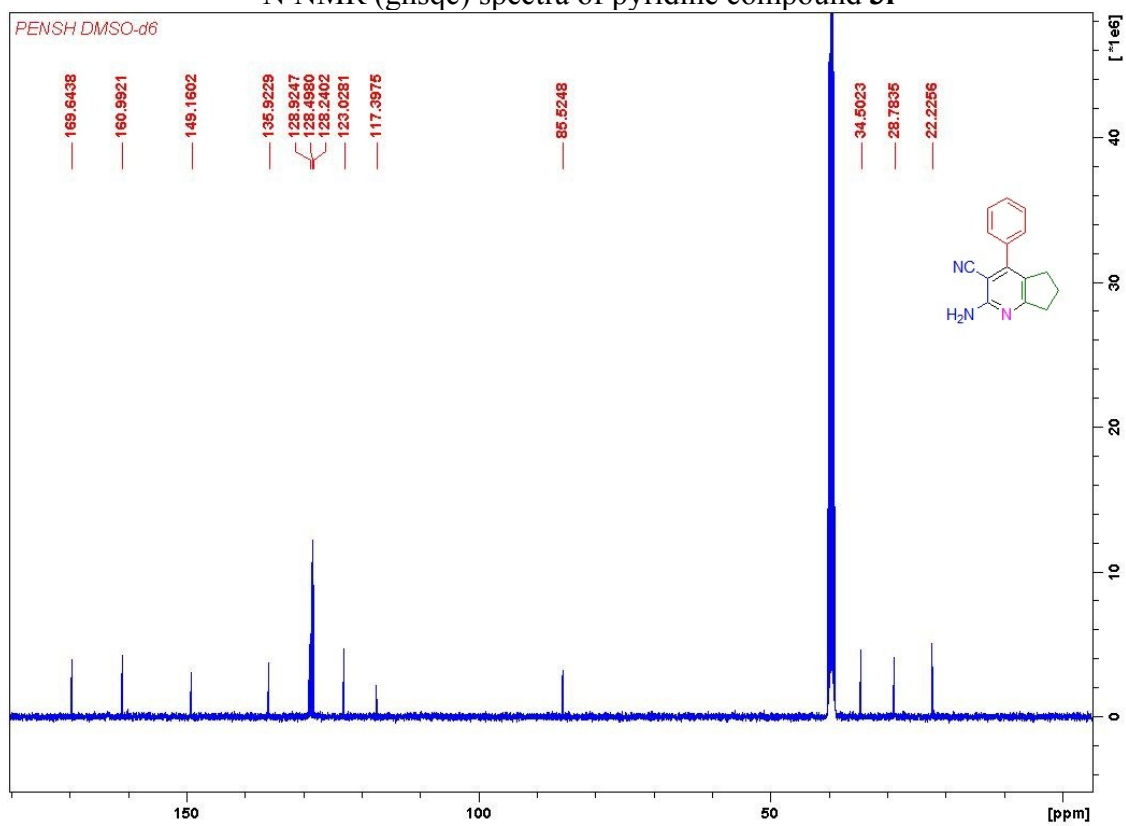

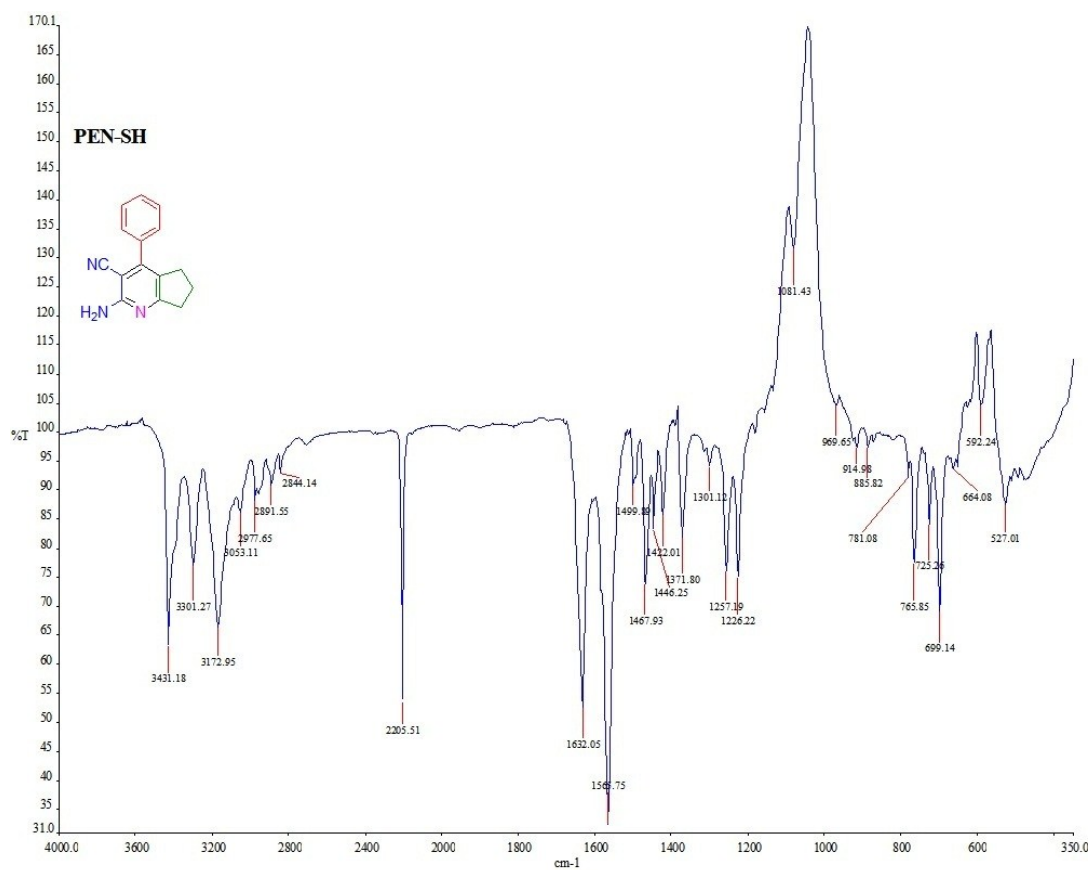

FTIR spectra of pyridine compound **3i**

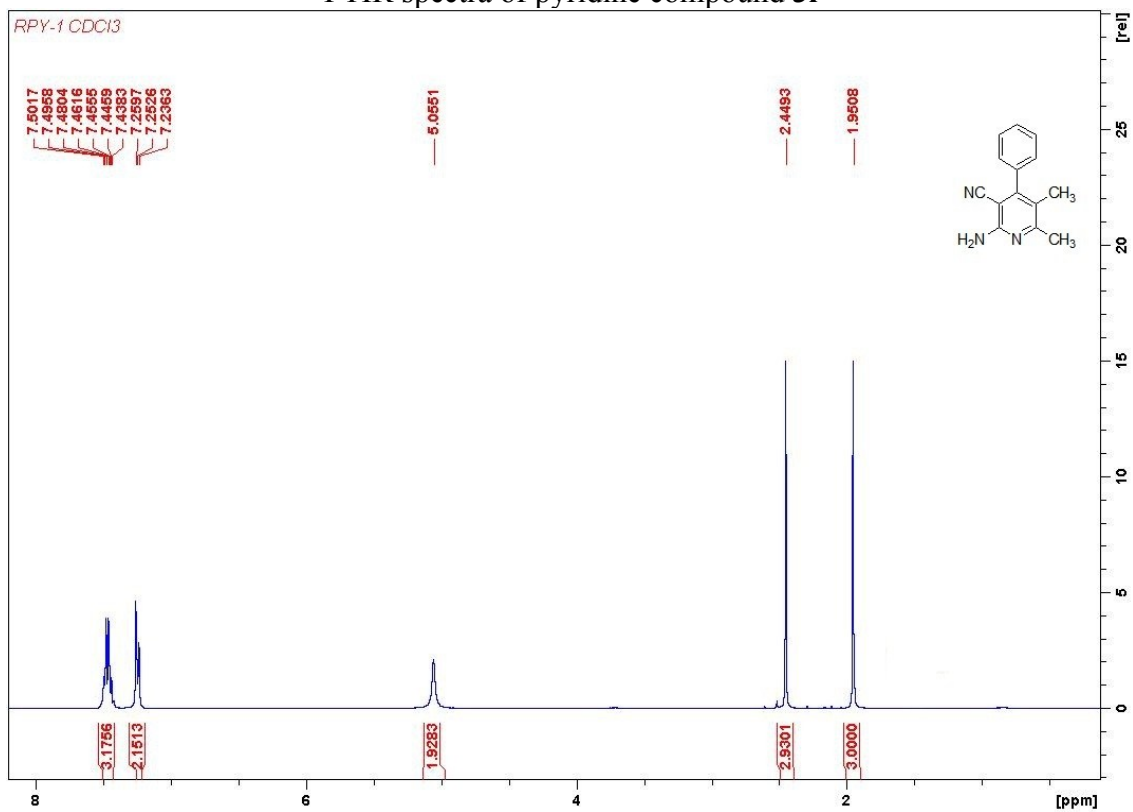

$^1\text{H}$  NMR spectra of pyridine compound **4a**

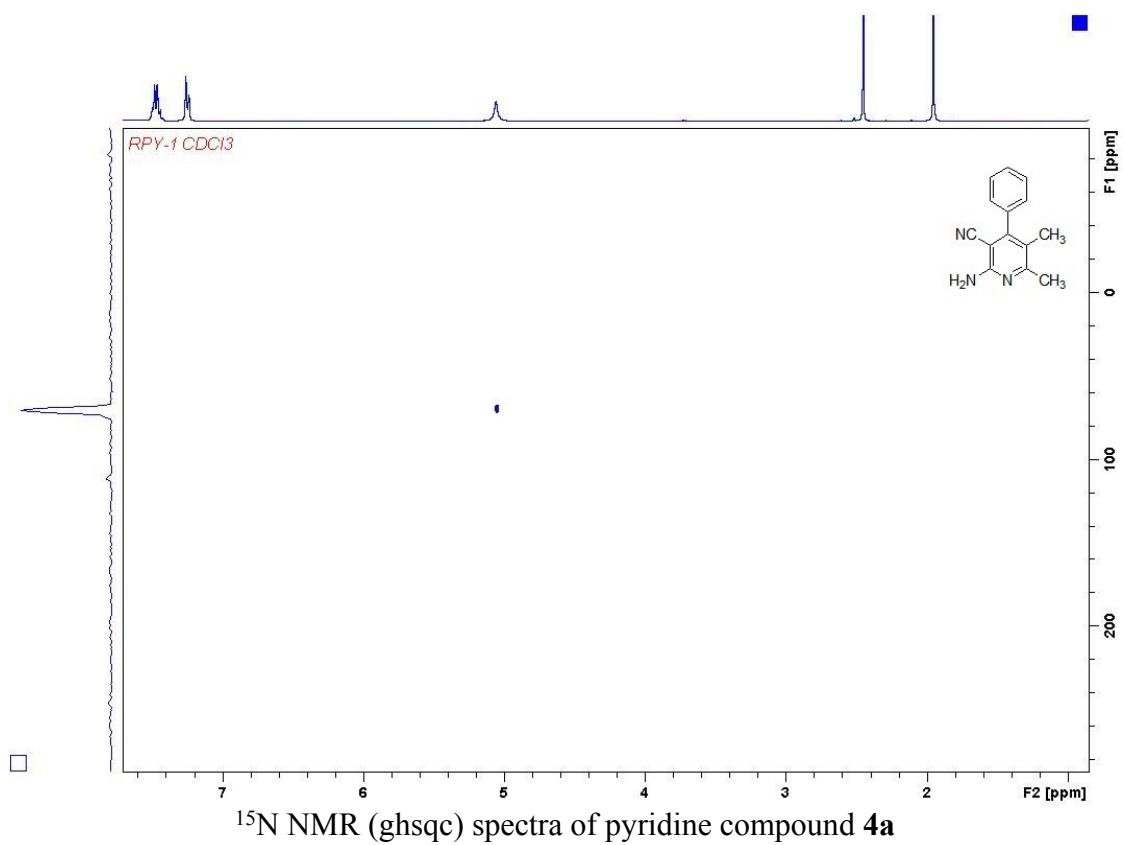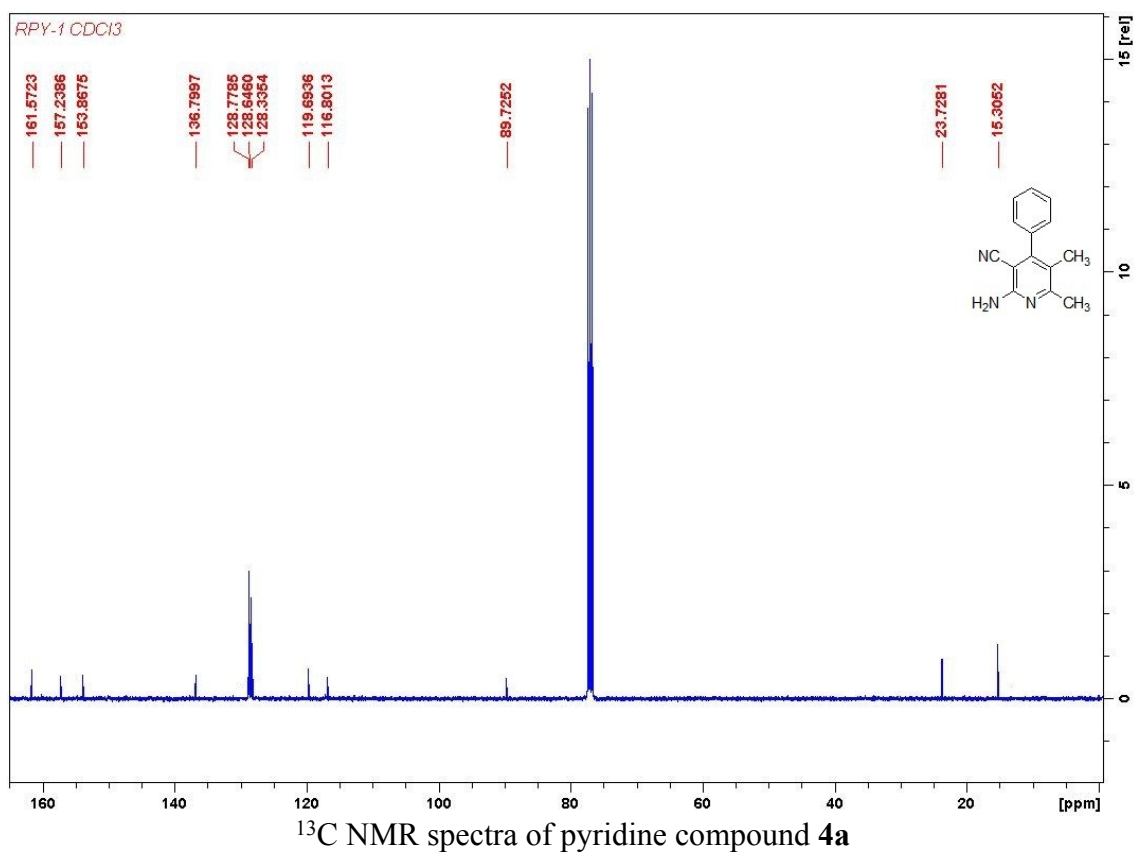

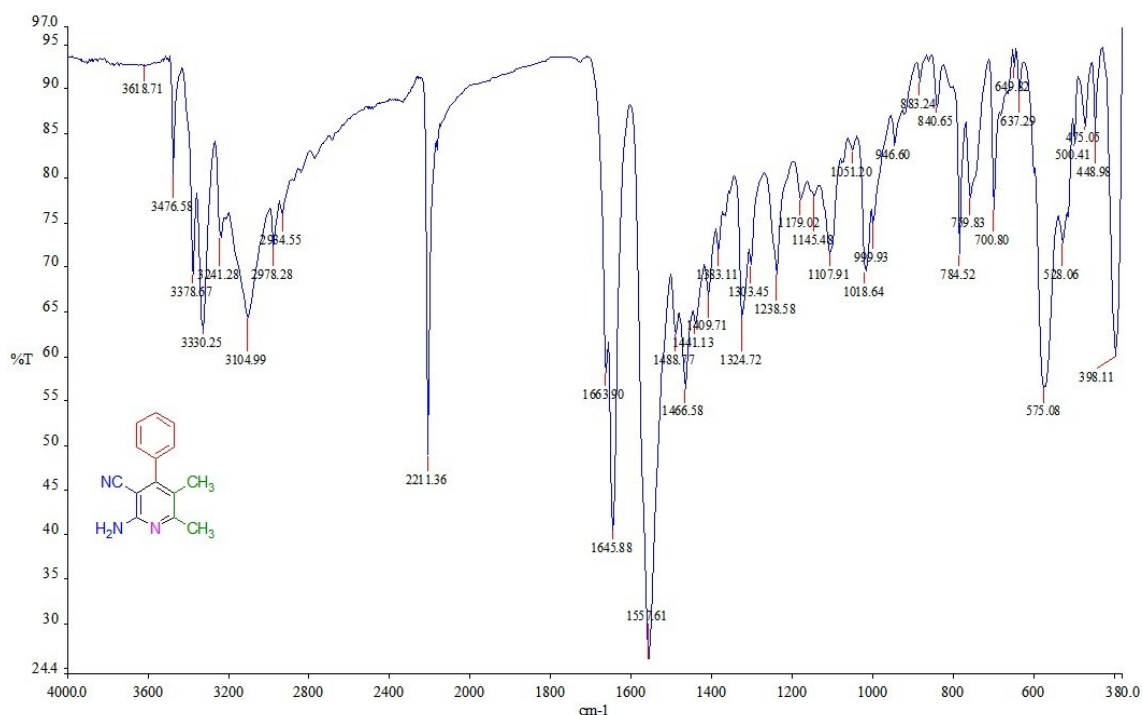

FTIR spectra of pyridine compound **4a**

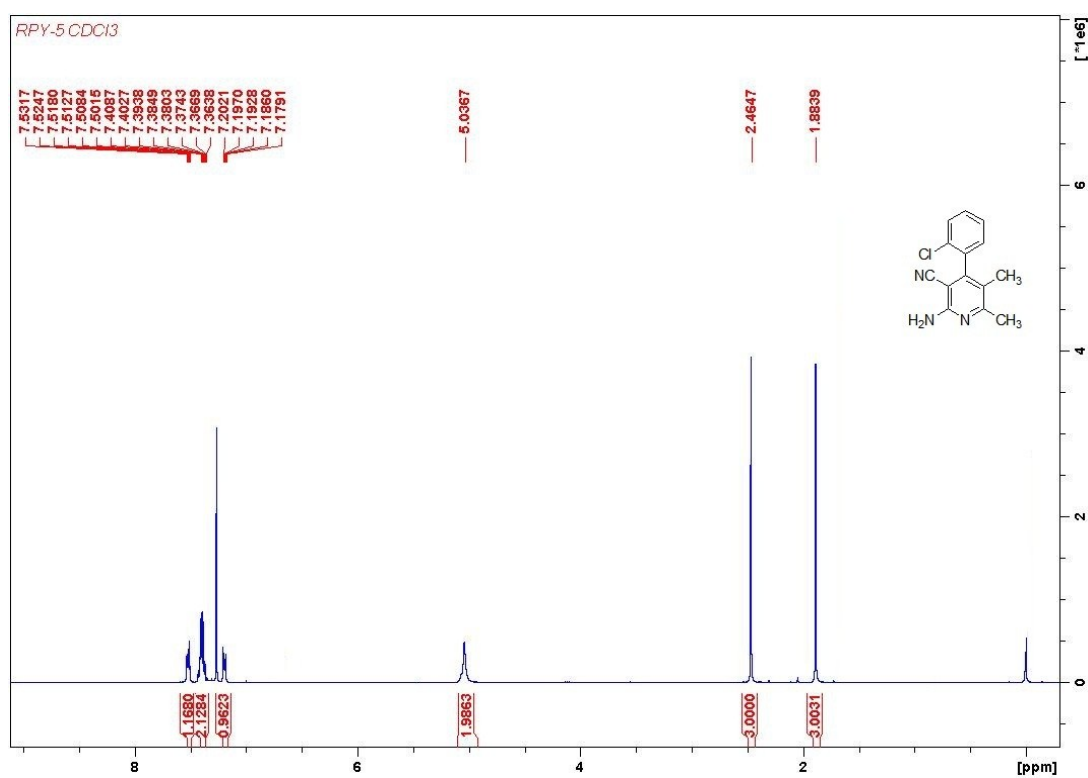

<sup>1</sup>H NMR spectra of pyridine compound **4b**

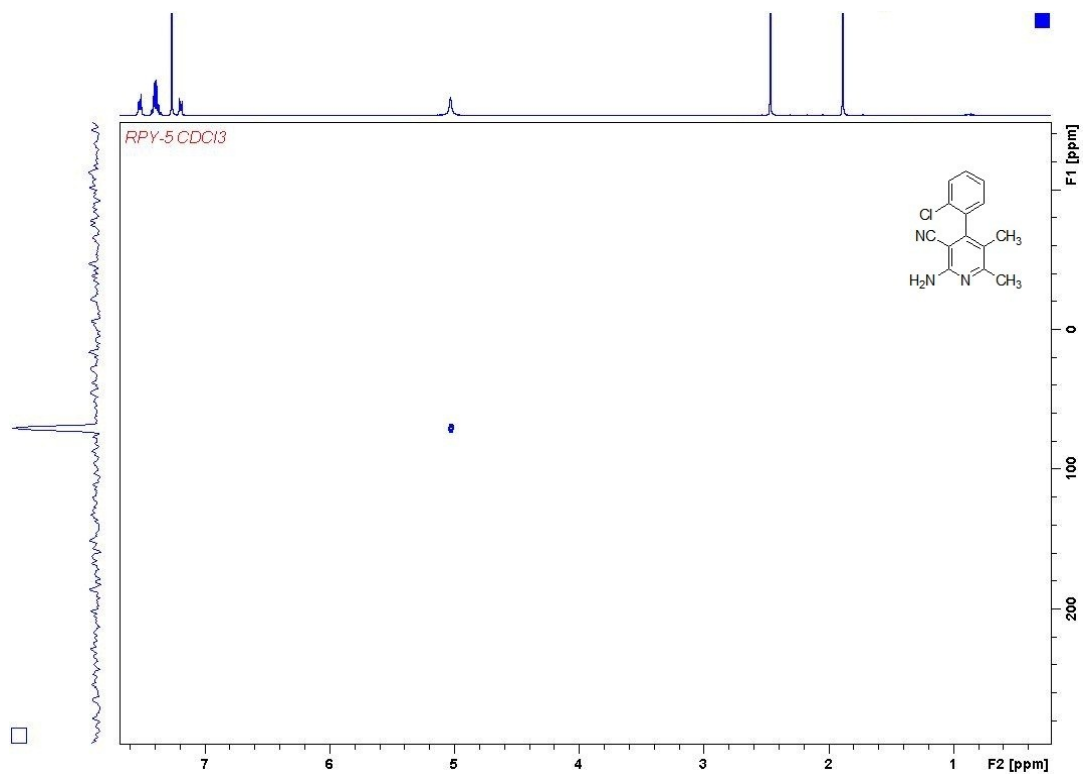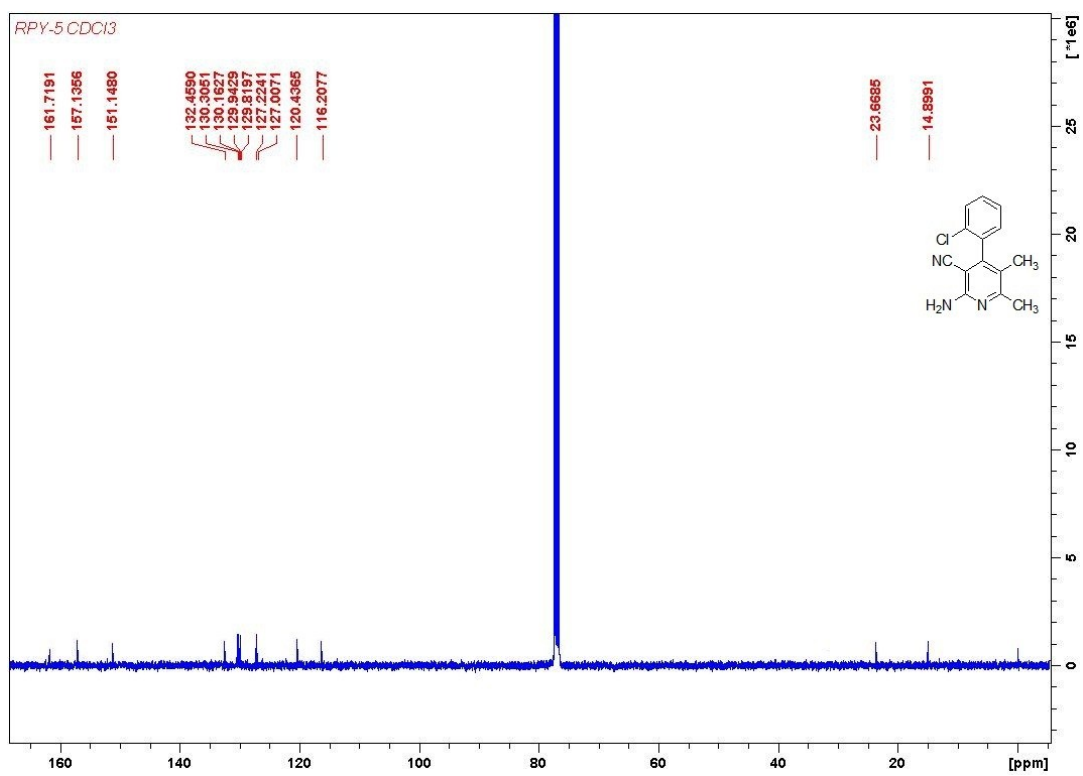



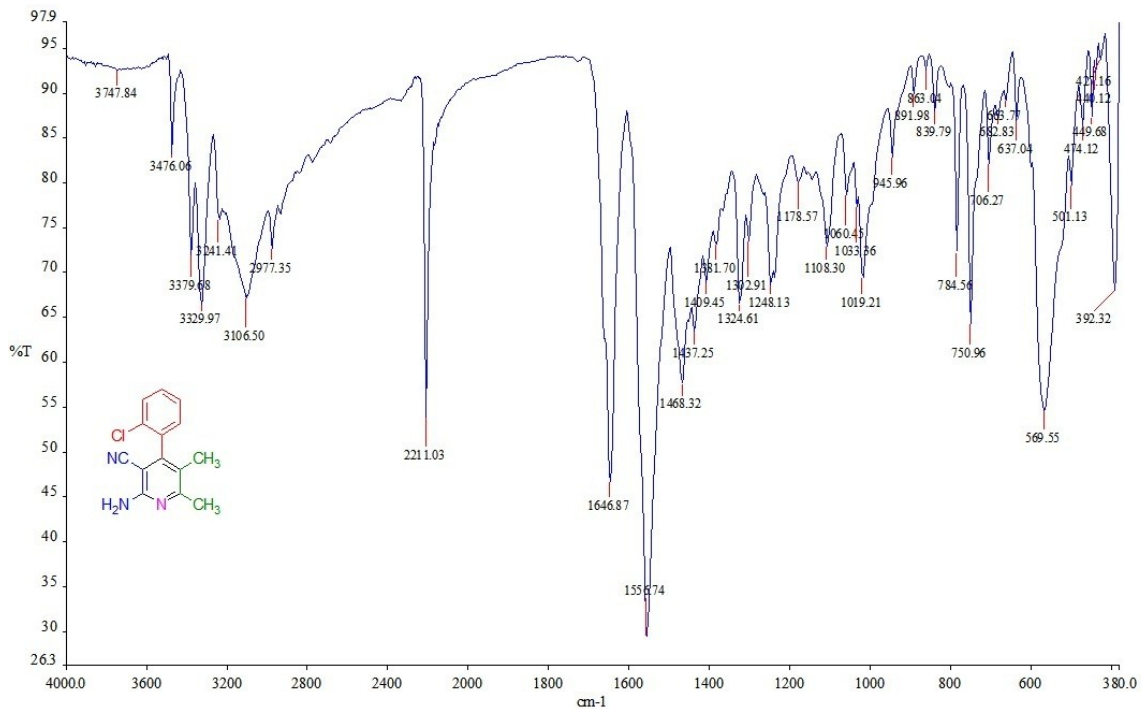

FTIR spectra of pyridine compound **4b**

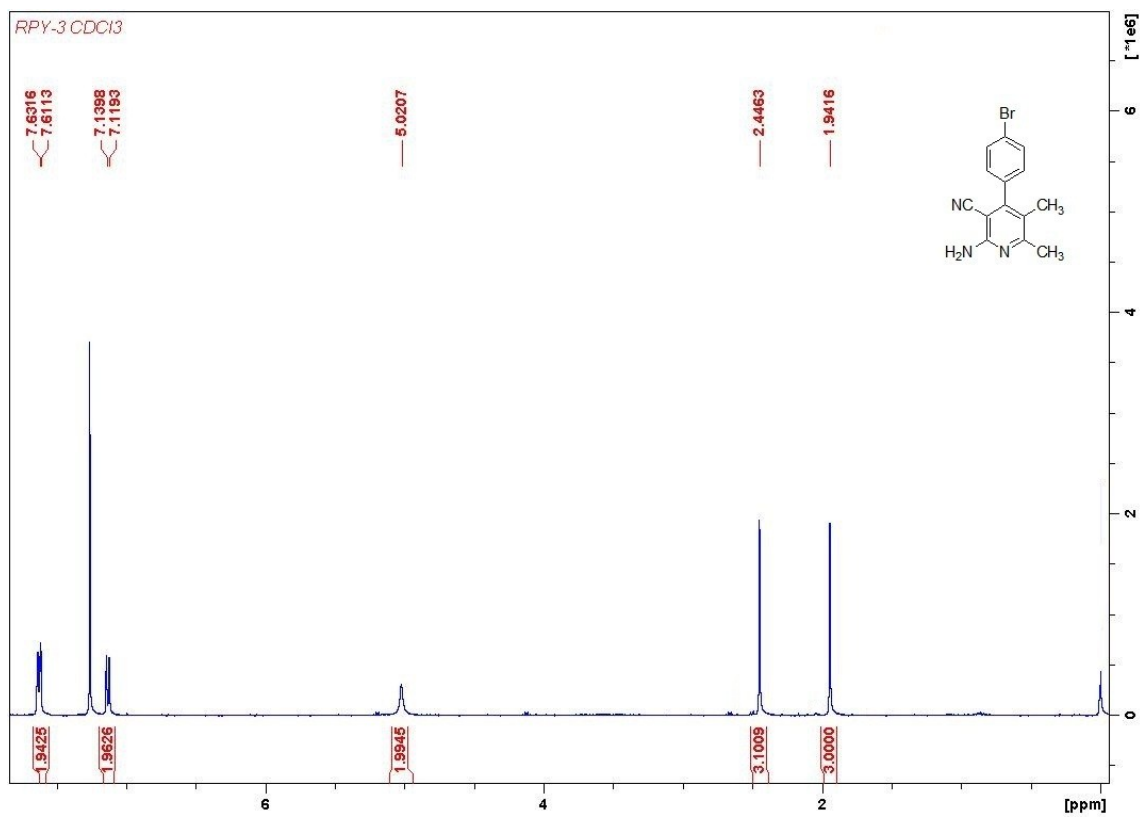

$^1\text{H}$  NMR spectra of pyridine compound **4c**

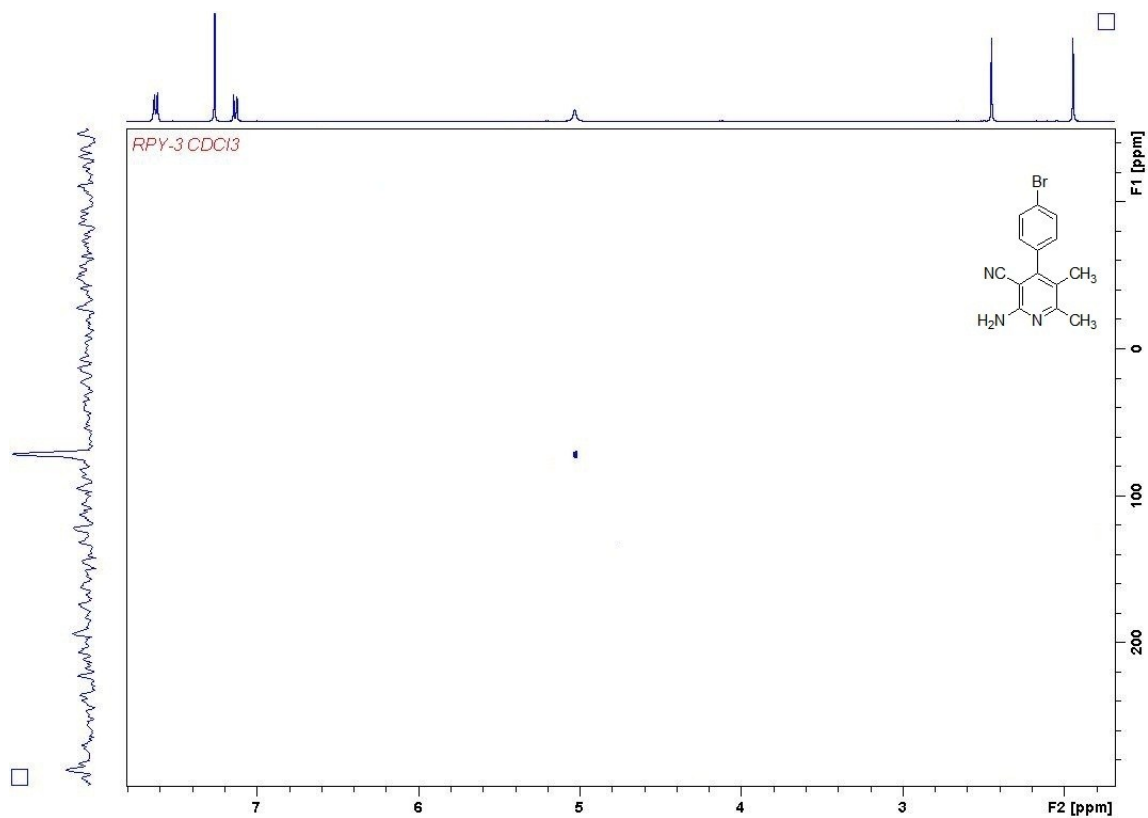

<sup>15</sup>N NMR (ghsqc) spectra of pyridine compound **4c**

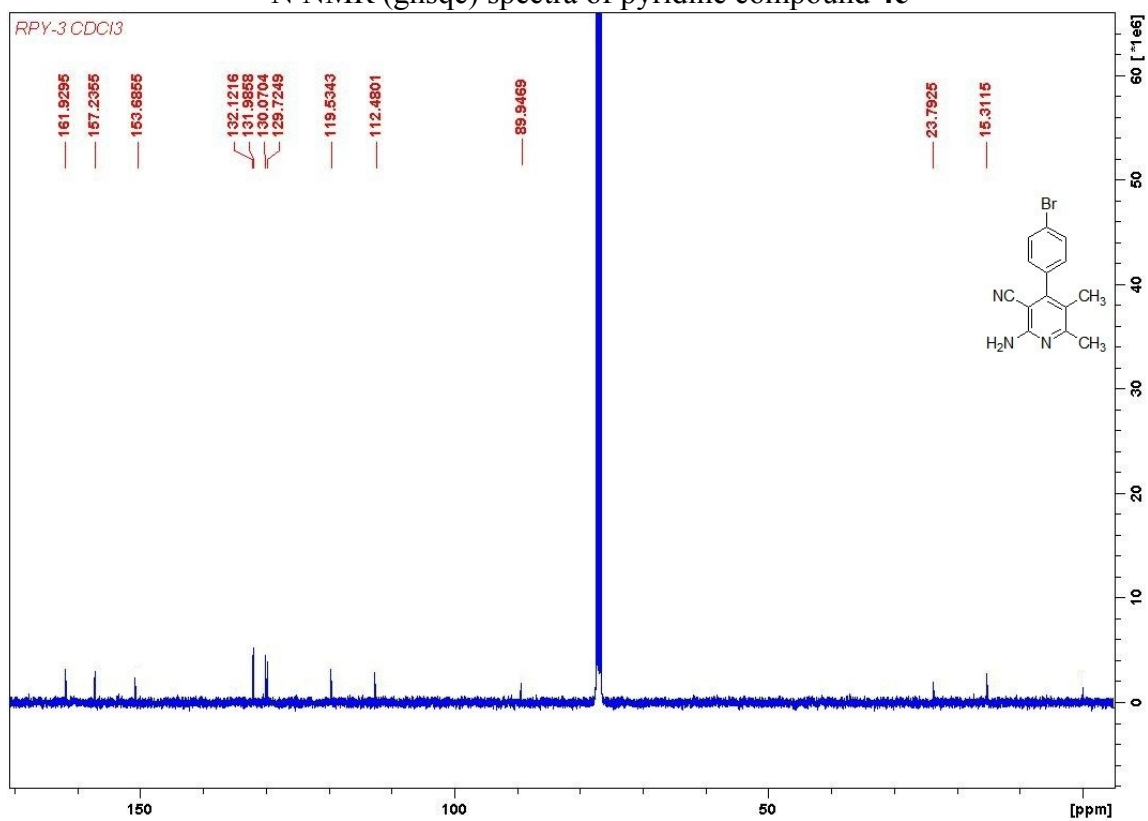

<sup>13</sup>C NMR spectra of pyridine compound **4c**

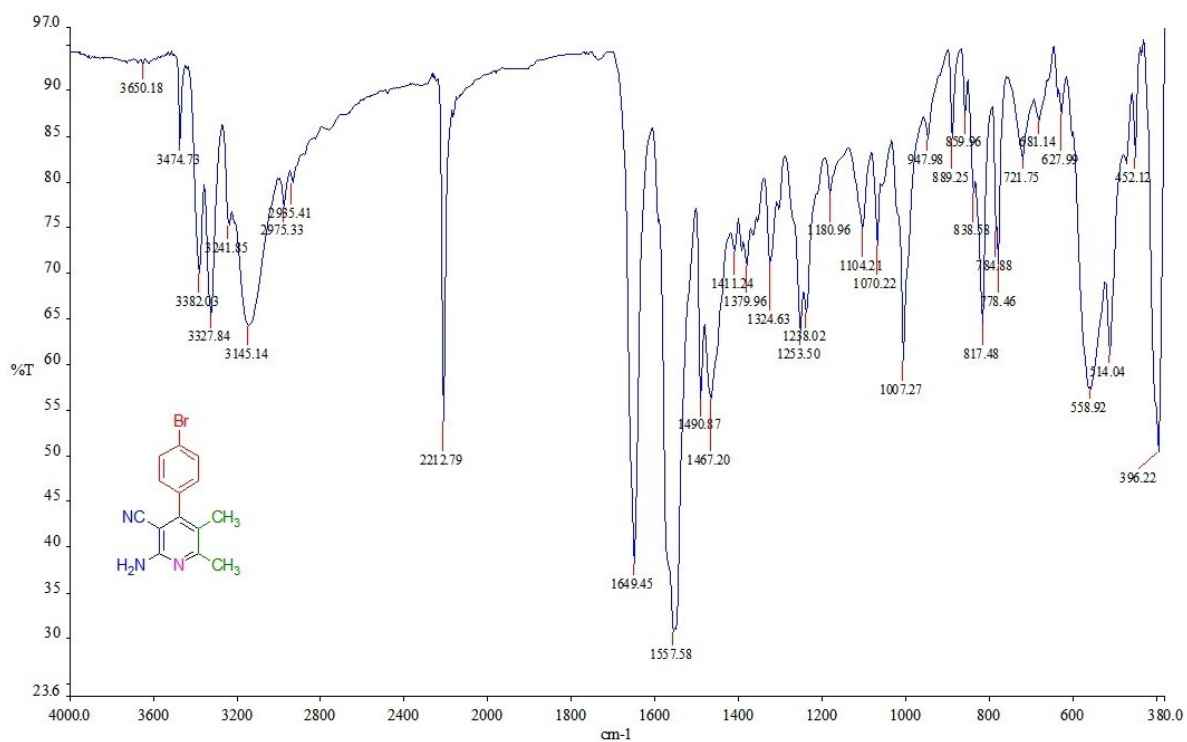

FTIR spectra of pyridine compound **4c**

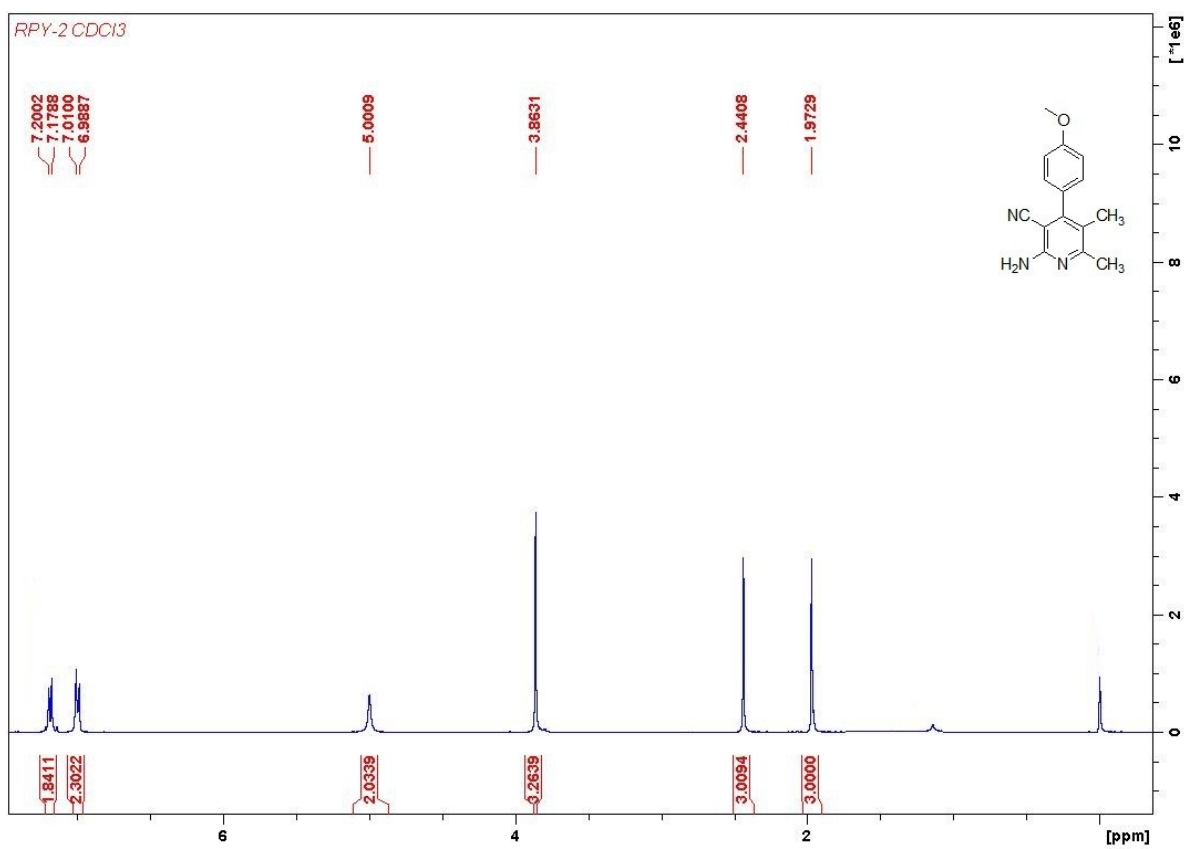

<sup>1</sup>H NMR spectra of pyridine compound **4d**

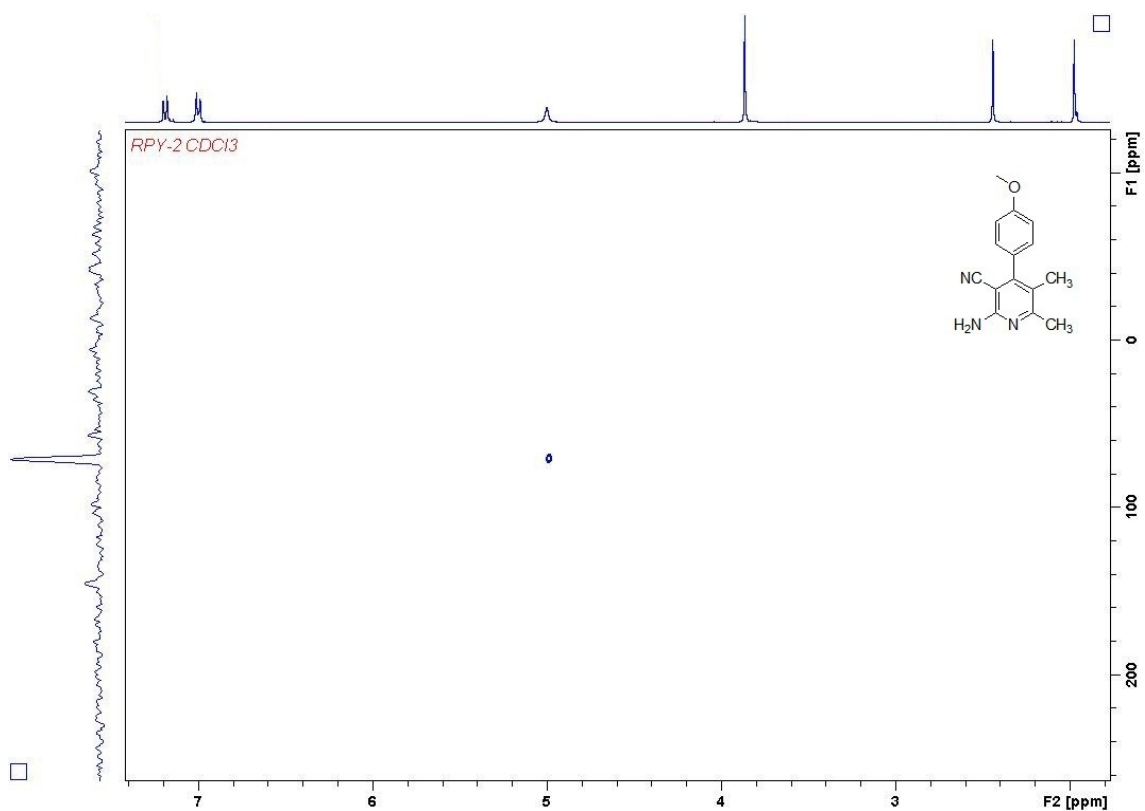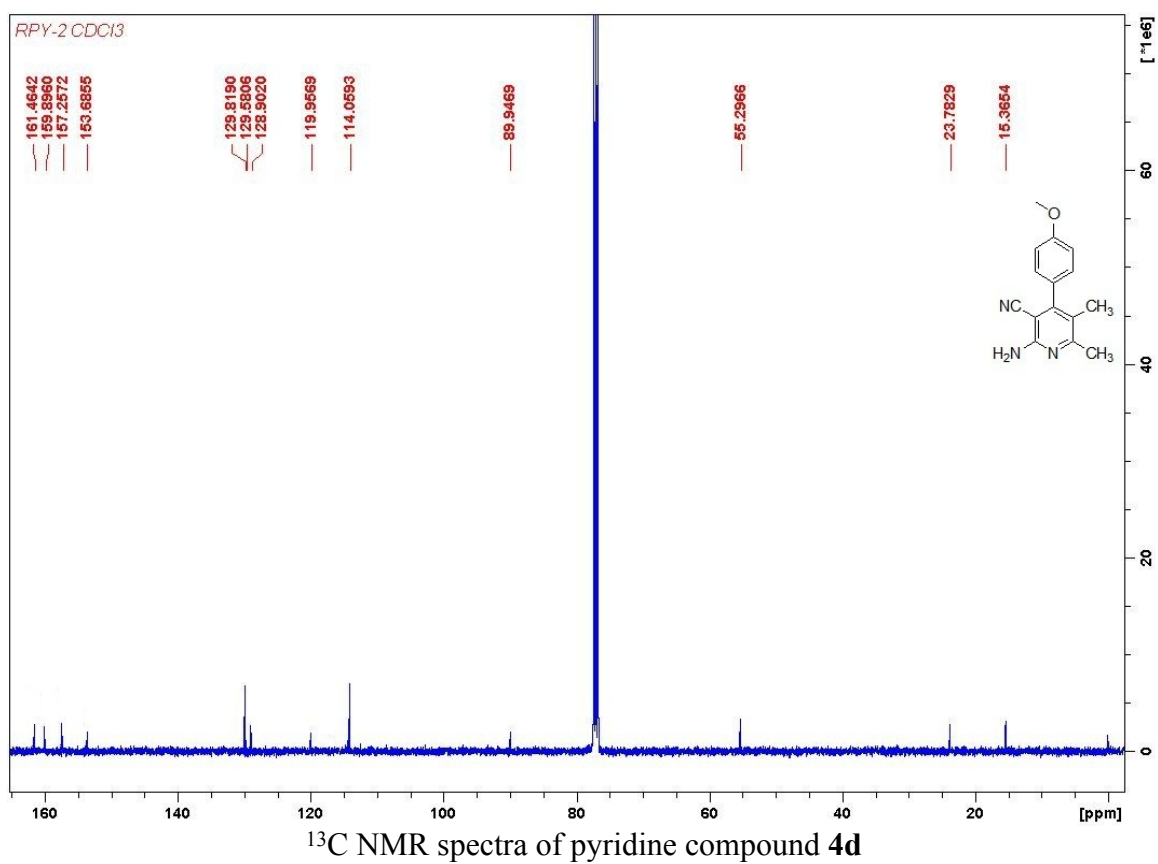

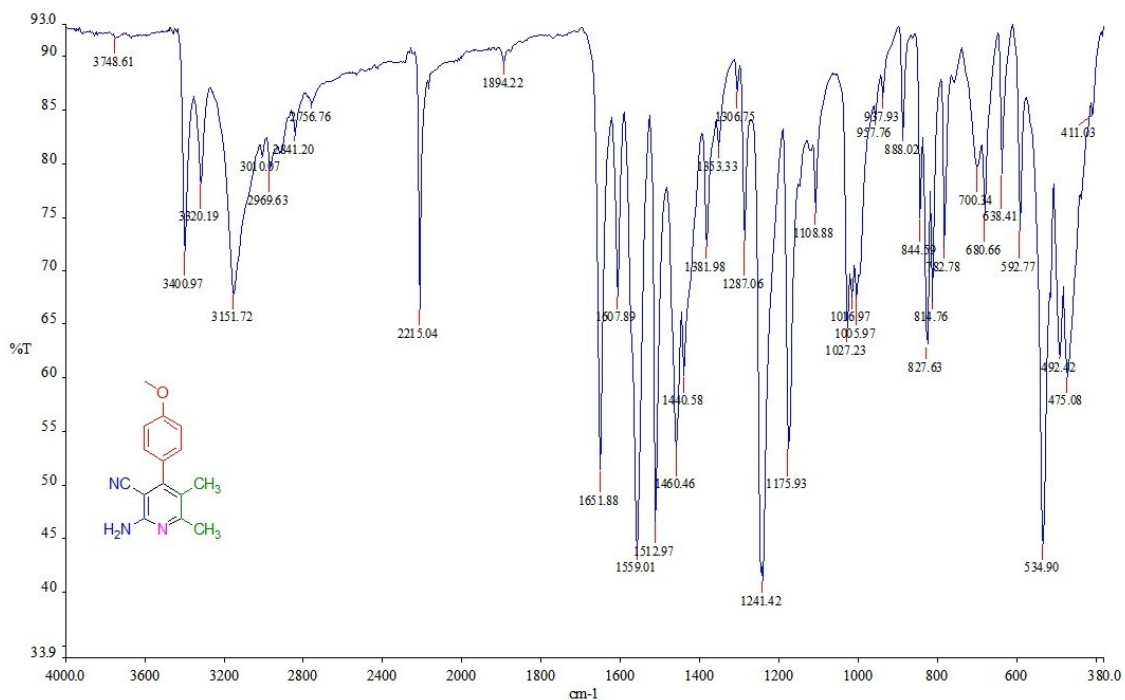

FTIR spectra of pyridine compound **4d**

4. D<sub>2</sub>O exchange study of compound (**3i**).

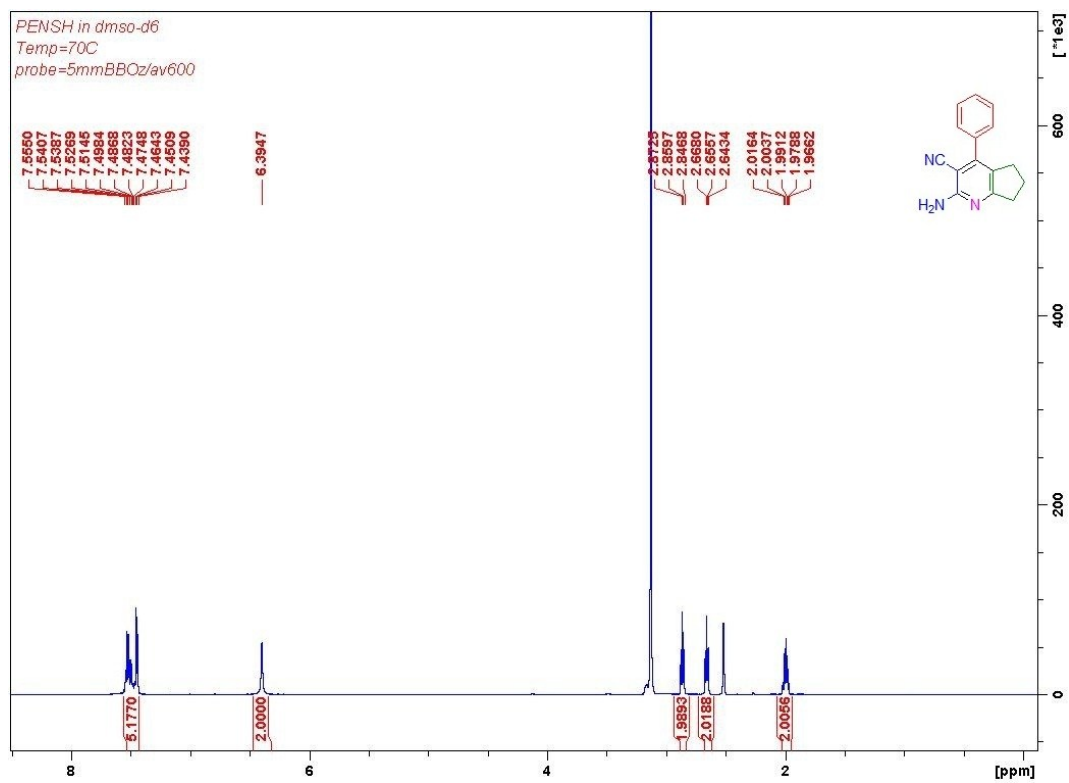

<sup>1</sup>H NMR spectra of compound **3i** (DMSO-d<sub>6</sub>)

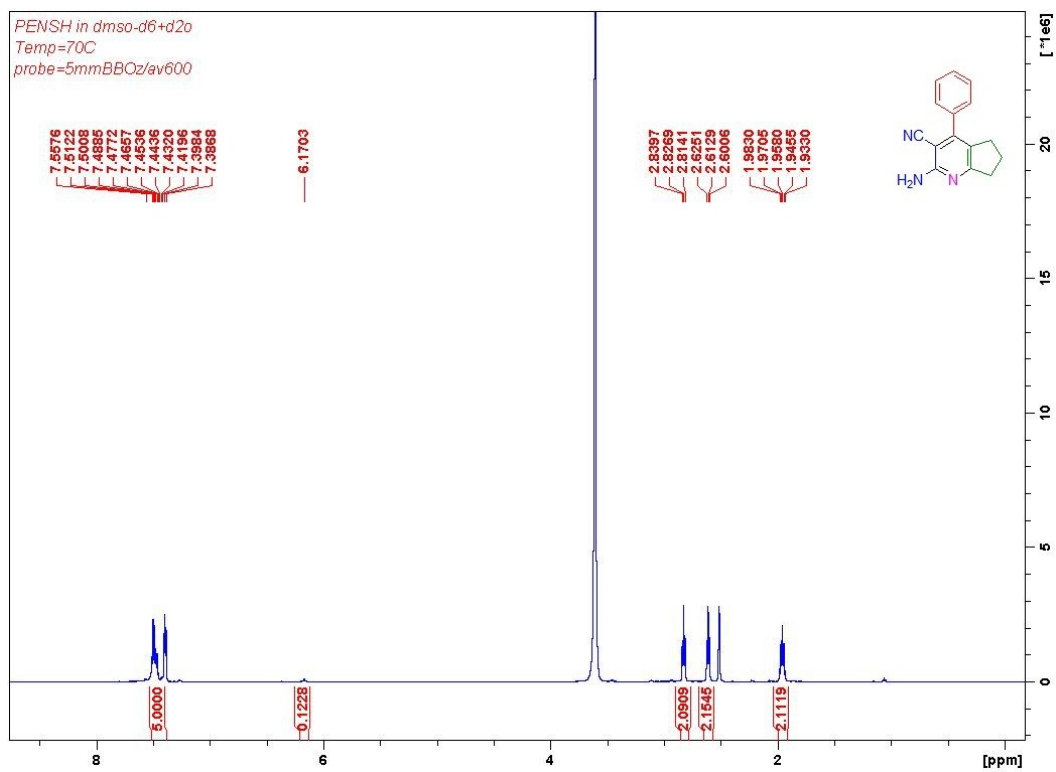

$^1\text{H}$  NMR spectra of compound **3i** (DMSO- $d_6$  +  $\text{D}_2\text{O}$ ). Absence of  $-\text{NH}_2$  peak

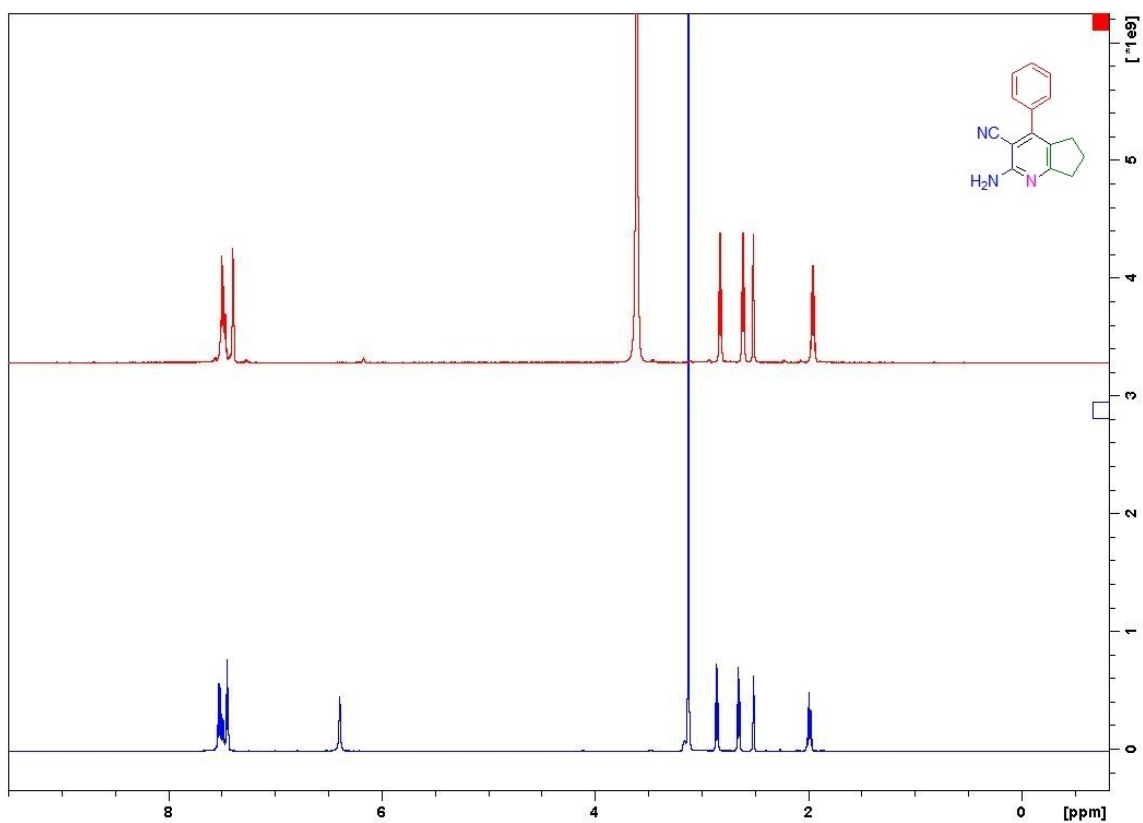

$^1\text{H}$  NMR comparison spectra of compound **3i** (Blue: DMSO- $d_6$ ; Red: DMSO- $d_6$  +  $\text{D}_2\text{O}$ )

5. Single Crystal X-ray data of compound (3a).

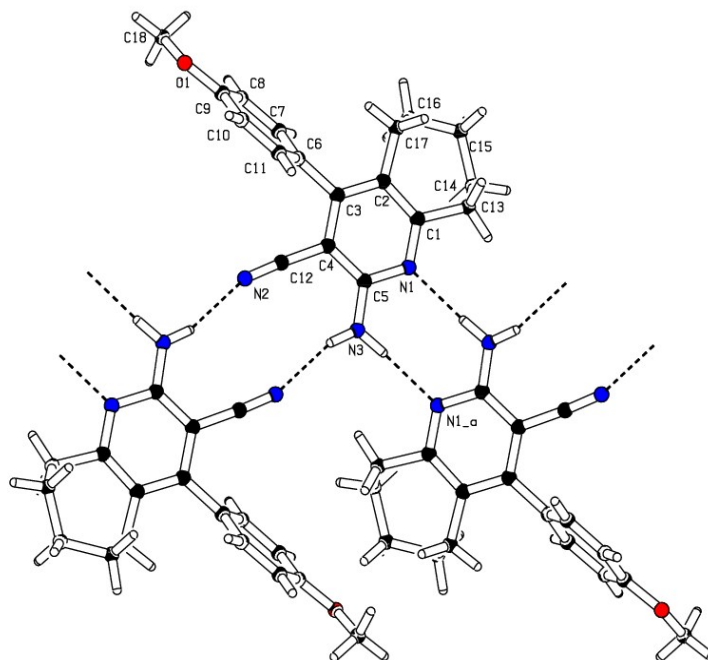

**Table 1.** Crystal data and structure refinement for 14ub\_sbj\_sk1a\_1\_0ma.

|                                   |                                                  |          |
|-----------------------------------|--------------------------------------------------|----------|
| Identification code               | shelx                                            |          |
| Empirical formula                 | C <sub>18</sub> H <sub>19</sub> N <sub>3</sub> O |          |
| Formula weight                    | 293.36                                           |          |
| Temperature                       | 173(2) K                                         |          |
| Wavelength                        | 0.71073 Å                                        |          |
| Crystal system                    | Orthorhombic                                     |          |
| Space group                       | P b c n                                          |          |
| Unit cell dimensions              | a = 15.7449(9) Å                                 | α = 90°. |
|                                   | b = 10.7620(7) Å                                 | β = 90°. |
|                                   | c = 18.2213(12) Å                                | γ = 90°. |
| Volume                            | 3087.5(3) Å <sup>3</sup>                         |          |
| Z                                 | 8                                                |          |
| Density (calculated)              | 1.262 Mg/m <sup>3</sup>                          |          |
| Absorption coefficient            | 0.080 mm <sup>-1</sup>                           |          |
| F(000)                            | 1248                                             |          |
| Crystal size                      | 0.380 x 0.300 x 0.260 mm <sup>3</sup>            |          |
| Theta range for data collection   | 2.235 to 27.996°.                                |          |
| Index ranges                      | -20 ≤ h ≤ 20, -14 ≤ k ≤ 13, -15 ≤ l ≤ 24         |          |
| Reflections collected             | 37338                                            |          |
| Independent reflections           | 3725 [R(int) = 0.0484]                           |          |
| Completeness to theta = 25.242°   | 100.0 %                                          |          |
| Absorption correction             | Semi-empirical from equivalents                  |          |
| Max. and min. transmission        | 0.979 and 0.970                                  |          |
| Refinement method                 | Full-matrix least-squares on F <sup>2</sup>      |          |
| Data / restraints / parameters    | 3725 / 0 / 207                                   |          |
| Goodness-of-fit on F <sup>2</sup> | 1.130                                            |          |
| Final R indices [I > 2σ(I)]       | R1 = 0.0577, wR2 = 0.1617                        |          |
| R indices (all data)              | R1 = 0.0701, wR2 = 0.1728                        |          |
| Extinction coefficient            | n/a                                              |          |
| Largest diff. peak and hole       | 0.372 and -0.246 e.Å <sup>-3</sup>               |          |



**Table 2.** Atomic coordinates ( $\times 10^4$ ) and equivalent isotropic displacement parameters ( $\text{\AA}^2 \times 10^3$ ) for 14ub\_sbj\_sk1a\_1\_0ma.  $U(\text{eq})$  is defined as one third of the trace of the orthogonalized  $U^{ij}$  tensor.

|       | x       | y       | z       | U(eq) |
|-------|---------|---------|---------|-------|
| C(1)  | 7988(1) | 3498(2) | 2588(1) | 31(1) |
| C(2)  | 7341(1) | 3643(2) | 3113(1) | 31(1) |
| C(3)  | 7579(1) | 4011(2) | 3818(1) | 31(1) |
| C(4)  | 8446(1) | 4210(2) | 3963(1) | 31(1) |
| C(5)  | 9054(1) | 4045(2) | 3403(1) | 31(1) |
| C(6)  | 6957(1) | 4226(2) | 4423(1) | 32(1) |
| C(7)  | 6479(1) | 3258(2) | 4715(1) | 35(1) |
| C(8)  | 5921(1) | 3452(2) | 5297(1) | 39(1) |
| C(9)  | 5833(1) | 4643(2) | 5584(1) | 39(1) |
| C(10) | 6289(1) | 5614(2) | 5286(1) | 43(1) |
| C(11) | 6854(1) | 5407(2) | 4714(1) | 40(1) |
| C(12) | 8735(1) | 4559(2) | 4677(1) | 39(1) |
| C(13) | 7780(1) | 3126(2) | 1811(1) | 37(1) |
| C(14) | 7416(1) | 1804(2) | 1740(1) | 46(1) |
| C(15) | 6483(1) | 1680(2) | 1933(1) | 45(1) |
| C(16) | 6261(1) | 2017(2) | 2720(1) | 44(1) |
| C(17) | 6428(1) | 3389(2) | 2911(1) | 37(1) |
| C(18) | 4874(2) | 3930(3) | 6500(1) | 65(1) |
| N(1)  | 8815(1) | 3680(2) | 2724(1) | 33(1) |
| N(2)  | 9006(1) | 4848(2) | 5234(1) | 59(1) |
| N(3)  | 9893(1) | 4228(2) | 3510(1) | 42(1) |
| O(1)  | 5313(1) | 4929(2) | 6157(1) | 53(1) |

**Table 3.** Bond lengths [Å] and angles [°] for 14ub\_sbj\_sk1a\_1\_0ma.

---

|              |          |
|--------------|----------|
| C(1)-N(1)    | 1.341(2) |
| C(1)-C(2)    | 1.405(2) |
| C(1)-C(13)   | 1.507(2) |
| C(2)-C(3)    | 1.396(2) |
| C(2)-C(17)   | 1.509(2) |
| C(3)-C(4)    | 1.407(2) |
| C(3)-C(6)    | 1.493(2) |
| C(4)-C(5)    | 1.410(2) |
| C(4)-C(12)   | 1.428(3) |
| C(5)-N(3)    | 1.350(2) |
| C(5)-N(1)    | 1.350(2) |
| C(6)-C(11)   | 1.388(3) |
| C(6)-C(7)    | 1.390(3) |
| C(7)-C(8)    | 1.393(3) |
| C(7)-H(7)    | 0.9500   |
| C(8)-C(9)    | 1.392(3) |
| C(8)-H(8)    | 0.9500   |
| C(9)-O(1)    | 1.362(2) |
| C(9)-C(10)   | 1.379(3) |
| C(10)-C(11)  | 1.388(3) |
| C(10)-H(10)  | 0.9500   |
| C(11)-H(11)  | 0.9500   |
| C(12)-N(2)   | 1.144(3) |
| C(13)-C(14)  | 1.539(3) |
| C(13)-H(13A) | 0.9900   |
| C(13)-H(13B) | 0.9900   |
| C(14)-C(15)  | 1.516(3) |
| C(14)-H(14A) | 0.9900   |
| C(14)-H(14B) | 0.9900   |
| C(15)-C(16)  | 1.519(3) |
| C(15)-H(15A) | 0.9900   |
| C(15)-H(15B) | 0.9900   |
| C(16)-C(17)  | 1.539(3) |
| C(16)-H(16A) | 0.9900   |
| C(16)-H(16B) | 0.9900   |

|                  |            |
|------------------|------------|
| C(17)-H(17A)     | 0.9900     |
| C(17)-H(17B)     | 0.9900     |
| C(18)-O(1)       | 1.422(3)   |
| C(18)-H(18A)     | 0.9800     |
| C(18)-H(18B)     | 0.9800     |
| C(18)-H(18C)     | 0.9800     |
| N(3)-H(1N)       | 0.96(3)    |
| N(3)-H(2N)       | 0.87(3)    |
|                  |            |
| N(1)-C(1)-C(2)   | 124.16(16) |
| N(1)-C(1)-C(13)  | 115.07(16) |
| C(2)-C(1)-C(13)  | 120.78(15) |
| C(3)-C(2)-C(1)   | 117.59(16) |
| C(3)-C(2)-C(17)  | 122.09(16) |
| C(1)-C(2)-C(17)  | 120.32(16) |
| C(2)-C(3)-C(4)   | 118.52(16) |
| C(2)-C(3)-C(6)   | 123.21(15) |
| C(4)-C(3)-C(6)   | 118.26(15) |
| C(3)-C(4)-C(5)   | 120.15(16) |
| C(3)-C(4)-C(12)  | 121.39(16) |
| C(5)-C(4)-C(12)  | 118.45(15) |
| N(3)-C(5)-N(1)   | 116.53(16) |
| N(3)-C(5)-C(4)   | 122.72(16) |
| N(1)-C(5)-C(4)   | 120.75(15) |
| C(11)-C(6)-C(7)  | 118.47(17) |
| C(11)-C(6)-C(3)  | 120.06(17) |
| C(7)-C(6)-C(3)   | 121.46(16) |
| C(6)-C(7)-C(8)   | 121.38(18) |
| C(6)-C(7)-H(7)   | 119.3      |
| C(8)-C(7)-H(7)   | 119.3      |
| C(9)-C(8)-C(7)   | 119.11(19) |
| C(9)-C(8)-H(8)   | 120.4      |
| C(7)-C(8)-H(8)   | 120.4      |
| O(1)-C(9)-C(10)  | 116.30(19) |
| O(1)-C(9)-C(8)   | 123.8(2)   |
| C(10)-C(9)-C(8)  | 119.92(18) |
| C(9)-C(10)-C(11) | 120.47(19) |

|                     |            |
|---------------------|------------|
| C(9)-C(10)-H(10)    | 119.8      |
| C(11)-C(10)-H(10)   | 119.8      |
| C(6)-C(11)-C(10)    | 120.62(19) |
| C(6)-C(11)-H(11)    | 119.7      |
| C(10)-C(11)-H(11)   | 119.7      |
| N(2)-C(12)-C(4)     | 176.6(2)   |
| C(1)-C(13)-C(14)    | 113.98(17) |
| C(1)-C(13)-H(13A)   | 108.8      |
| C(14)-C(13)-H(13A)  | 108.8      |
| C(1)-C(13)-H(13B)   | 108.8      |
| C(14)-C(13)-H(13B)  | 108.8      |
| H(13A)-C(13)-H(13B) | 107.7      |
| C(15)-C(14)-C(13)   | 114.98(18) |
| C(15)-C(14)-H(14A)  | 108.5      |
| C(13)-C(14)-H(14A)  | 108.5      |
| C(15)-C(14)-H(14B)  | 108.5      |
| C(13)-C(14)-H(14B)  | 108.5      |
| H(14A)-C(14)-H(14B) | 107.5      |
| C(14)-C(15)-C(16)   | 114.93(17) |
| C(14)-C(15)-H(15A)  | 108.5      |
| C(16)-C(15)-H(15A)  | 108.5      |
| C(14)-C(15)-H(15B)  | 108.5      |
| C(16)-C(15)-H(15B)  | 108.5      |
| H(15A)-C(15)-H(15B) | 107.5      |
| C(15)-C(16)-C(17)   | 113.80(17) |
| C(15)-C(16)-H(16A)  | 108.8      |
| C(17)-C(16)-H(16A)  | 108.8      |
| C(15)-C(16)-H(16B)  | 108.8      |
| C(17)-C(16)-H(16B)  | 108.8      |
| H(16A)-C(16)-H(16B) | 107.7      |
| C(2)-C(17)-C(16)    | 113.00(16) |
| C(2)-C(17)-H(17A)   | 109.0      |
| C(16)-C(17)-H(17A)  | 109.0      |
| C(2)-C(17)-H(17B)   | 109.0      |
| C(16)-C(17)-H(17B)  | 109.0      |
| H(17A)-C(17)-H(17B) | 107.8      |
| O(1)-C(18)-H(18A)   | 109.5      |

|                     |            |
|---------------------|------------|
| O(1)-C(18)-H(18B)   | 109.5      |
| H(18A)-C(18)-H(18B) | 109.5      |
| O(1)-C(18)-H(18C)   | 109.5      |
| H(18A)-C(18)-H(18C) | 109.5      |
| H(18B)-C(18)-H(18C) | 109.5      |
| C(1)-N(1)-C(5)      | 118.82(15) |
| C(5)-N(3)-H(1N)     | 119.1(16)  |
| C(5)-N(3)-H(2N)     | 123.6(18)  |
| H(1N)-N(3)-H(2N)    | 117(2)     |
| C(9)-O(1)-C(18)     | 117.25(18) |

---

Symmetry transformations used to generate equivalent atoms:

**Table 4.** Anisotropic displacement parameters ( $\text{\AA}^2 \times 10^3$ ) for 14ub\_sbj\_sk1a\_1\_0ma. The anisotropic displacement factor exponent takes the form:  $-2\pi^2 [ h^2 a^2 U^{11} + \dots + 2 h k a^* b^* U^{12} ]$

|       | U <sup>11</sup> | U <sup>22</sup> | U <sup>33</sup> | U <sup>23</sup> | U <sup>13</sup> | U <sup>12</sup> |
|-------|-----------------|-----------------|-----------------|-----------------|-----------------|-----------------|
| C(1)  | 28(1)           | 35(1)           | 30(1)           | 0(1)            | -2(1)           | -3(1)           |
| C(2)  | 27(1)           | 35(1)           | 31(1)           | 0(1)            | -3(1)           | -2(1)           |
| C(3)  | 26(1)           | 35(1)           | 31(1)           | -1(1)           | -1(1)           | -1(1)           |
| C(4)  | 26(1)           | 39(1)           | 28(1)           | -2(1)           | -2(1)           | -3(1)           |
| C(5)  | 25(1)           | 38(1)           | 30(1)           | 0(1)            | -2(1)           | -2(1)           |
| C(6)  | 24(1)           | 41(1)           | 29(1)           | -2(1)           | -3(1)           | 1(1)            |
| C(7)  | 32(1)           | 38(1)           | 36(1)           | -1(1)           | 3(1)            | 5(1)            |
| C(8)  | 34(1)           | 46(1)           | 37(1)           | 5(1)            | 4(1)            | 6(1)            |
| C(9)  | 32(1)           | 57(1)           | 29(1)           | -3(1)           | 1(1)            | 11(1)           |
| C(10) | 41(1)           | 44(1)           | 44(1)           | -12(1)          | -3(1)           | 3(1)            |
| C(11) | 32(1)           | 43(1)           | 45(1)           | -7(1)           | -1(1)           | -5(1)           |
| C(12) | 26(1)           | 58(1)           | 33(1)           | -3(1)           | 2(1)            | -5(1)           |
| C(13) | 34(1)           | 49(1)           | 29(1)           | -4(1)           | 0(1)            | -9(1)           |
| C(14) | 44(1)           | 48(1)           | 45(1)           | -11(1)          | -5(1)           | -6(1)           |
| C(15) | 46(1)           | 46(1)           | 45(1)           | -3(1)           | -8(1)           | -14(1)          |
| C(16) | 35(1)           | 56(1)           | 41(1)           | 2(1)            | -5(1)           | -14(1)          |
| C(17) | 25(1)           | 51(1)           | 34(1)           | -1(1)           | -4(1)           | 0(1)            |
| C(18) | 72(2)           | 74(2)           | 48(1)           | 16(1)           | 26(1)           | 29(1)           |
| N(1)  | 26(1)           | 42(1)           | 29(1)           | -3(1)           | 0(1)            | -3(1)           |
| N(2)  | 36(1)           | 105(2)          | 35(1)           | -12(1)          | -4(1)           | -12(1)          |
| N(3)  | 24(1)           | 67(1)           | 36(1)           | -10(1)          | -1(1)           | -7(1)           |
| O(1)  | 55(1)           | 64(1)           | 40(1)           | -2(1)           | 15(1)           | 16(1)           |

**Table 5.** Hydrogen coordinates ( $\times 10^4$ ) and isotropic displacement parameters ( $\text{\AA}^2 \times 10^3$ ) for 14ub\_sbj\_sk1a\_1\_0ma.

|        | x         | y        | z        | U(eq) |
|--------|-----------|----------|----------|-------|
| H(7)   | 6535      | 2448     | 4513     | 43    |
| H(8)   | 5604      | 2779     | 5495     | 46    |
| H(10)  | 6215      | 6431     | 5474     | 52    |
| H(11)  | 7173      | 6081     | 4521     | 48    |
| H(13A) | 8303      | 3184     | 1511     | 45    |
| H(13B) | 7364      | 3723     | 1608     | 45    |
| H(14A) | 7498      | 1519     | 1228     | 55    |
| H(14B) | 7747      | 1243     | 2062     | 55    |
| H(15A) | 6306      | 811      | 1843     | 55    |
| H(15B) | 6151      | 2219     | 1600     | 55    |
| H(16A) | 6597      | 1487     | 3056     | 53    |
| H(16B) | 5653      | 1832     | 2805     | 53    |
| H(17A) | 6271      | 3912     | 2485     | 44    |
| H(17B) | 6059      | 3630     | 3328     | 44    |
| H(18A) | 4523      | 4253     | 6900     | 97    |
| H(18B) | 5286      | 3335     | 6696     | 97    |
| H(18C) | 4511      | 3515     | 6138     | 97    |
| H(1N)  | 10278(17) | 4080(20) | 3115(15) | 52(7) |
| H(2N)  | 10108(17) | 4500(20) | 3920(16) | 54(7) |

**Table 6.** Torsion angles [°] for 14ub\_sbj\_sk1a\_1\_0ma.

---

|                         |             |
|-------------------------|-------------|
| N(1)-C(1)-C(2)-C(3)     | 0.7(3)      |
| C(13)-C(1)-C(2)-C(3)    | -178.86(17) |
| N(1)-C(1)-C(2)-C(17)    | -178.63(17) |
| C(13)-C(1)-C(2)-C(17)   | 1.8(3)      |
| C(1)-C(2)-C(3)-C(4)     | -0.3(3)     |
| C(17)-C(2)-C(3)-C(4)    | 178.98(17)  |
| C(1)-C(2)-C(3)-C(6)     | 178.66(17)  |
| C(17)-C(2)-C(3)-C(6)    | -2.0(3)     |
| C(2)-C(3)-C(4)-C(5)     | 0.4(3)      |
| C(6)-C(3)-C(4)-C(5)     | -178.63(16) |
| C(2)-C(3)-C(4)-C(12)    | -178.50(18) |
| C(6)-C(3)-C(4)-C(12)    | 2.4(3)      |
| C(3)-C(4)-C(5)-N(3)     | 179.68(18)  |
| C(12)-C(4)-C(5)-N(3)    | -1.4(3)     |
| C(3)-C(4)-C(5)-N(1)     | -0.8(3)     |
| C(12)-C(4)-C(5)-N(1)    | 178.11(18)  |
| C(2)-C(3)-C(6)-C(11)    | -115.1(2)   |
| C(4)-C(3)-C(6)-C(11)    | 63.9(2)     |
| C(2)-C(3)-C(6)-C(7)     | 65.8(2)     |
| C(4)-C(3)-C(6)-C(7)     | -115.2(2)   |
| C(11)-C(6)-C(7)-C(8)    | -1.4(3)     |
| C(3)-C(6)-C(7)-C(8)     | 177.75(17)  |
| C(6)-C(7)-C(8)-C(9)     | 0.9(3)      |
| C(7)-C(8)-C(9)-O(1)     | -179.23(18) |
| C(7)-C(8)-C(9)-C(10)    | 0.7(3)      |
| O(1)-C(9)-C(10)-C(11)   | 178.15(18)  |
| C(8)-C(9)-C(10)-C(11)   | -1.8(3)     |
| C(7)-C(6)-C(11)-C(10)   | 0.3(3)      |
| C(3)-C(6)-C(11)-C(10)   | -178.85(18) |
| C(9)-C(10)-C(11)-C(6)   | 1.3(3)      |
| N(1)-C(1)-C(13)-C(14)   | 114.29(19)  |
| C(2)-C(1)-C(13)-C(14)   | -66.1(2)    |
| C(1)-C(13)-C(14)-C(15)  | 79.1(2)     |
| C(13)-C(14)-C(15)-C(16) | -61.4(3)    |
| C(14)-C(15)-C(16)-C(17) | 63.8(3)     |



|                        |             |
|------------------------|-------------|
| C(3)-C(2)-C(17)-C(16)  | -114.2(2)   |
| C(1)-C(2)-C(17)-C(16)  | 65.1(2)     |
| C(15)-C(16)-C(17)-C(2) | -82.9(2)    |
| C(2)-C(1)-N(1)-C(5)    | -1.1(3)     |
| C(13)-C(1)-N(1)-C(5)   | 178.48(16)  |
| N(3)-C(5)-N(1)-C(1)    | -179.33(17) |
| C(4)-C(5)-N(1)-C(1)    | 1.2(3)      |
| C(10)-C(9)-O(1)-C(18)  | -176.5(2)   |
| C(8)-C(9)-O(1)-C(18)   | 3.5(3)      |

---

Symmetry transformations used to generate equivalent atoms:

**Table 7.** Hydrogen bonds for 14ub\_sbj\_sk1a\_1\_0ma [ $\text{\AA}$  and  $^\circ$ ].

| D-H...A           | d(D-H)  | d(H...A) | d(D...A) | $\angle$ (DHA) | Symmetry operations |
|-------------------|---------|----------|----------|----------------|---------------------|
| N(3)—H(1N)...N(1) | 0.96(3) | 2.14(3)  | 3.090(2) | 177(2)         | -x,y,1/2-z          |
| N(3)—H(2N)...N(2) | 0.87(3) | 2.19(3)  | 3.038(3) | 163(3)         | -x,1-y,-z           |
